# 1 Energy efficient network activity from disparate 2 circuit parameters

3 Michael Deistler<sup>1,2</sup>, Jakob H. Macke<sup>1,2,3\*</sup>, Pedro J. Gonçalves<sup>1,4\*</sup>

4 <sup>1</sup>Machine Learning in Science, Excellence Cluster 'Machine Learning', Tübingen University, Tübingen,  
5 Germany; <sup>2</sup>Computational Neuroengineering, Department of Electrical and Computer Engineering,  
6 Technical University of Munich, Germany; <sup>3</sup>Max Planck Institute for Intelligent Systems, Tübingen,  
7 Germany; <sup>4</sup>Center of Advanced European Studies and Research (caesar), Bonn, Germany

---

## 9 Abstract

10 Neural circuits can produce similar activity patterns from vastly different combinations of channel and synaptic con-  
11 ductances. These conductances are tuned for specific activity patterns but might also reflect additional constraints,  
12 such as metabolic cost or robustness to perturbations. How do such constraints influence the range of permissible  
13 conductances? Here, we investigate how metabolic cost affects the parameters of neural circuits with similar activity  
14 in a model of the pyloric network of the crab *Cancer borealis*. We use a novel machine learning method to identify a  
15 range of network models that can generate activity patterns matching experimental data, and find that neural circuits  
16 can consume largely different amounts of energy despite similar circuit activity. Furthermore, a reduced but still sig-  
17 nificant range of circuit parameters gives rise to energy-efficient circuits. We then examine the space of parameters  
18 of energy-efficient circuits and identify potential tuning strategies for low metabolic cost. Finally, we investigate the  
19 interaction between metabolic cost and temperature robustness. We show that metabolic cost can vary across tem-  
20 peratures, but that robustness to temperature changes does not necessarily incur an increased metabolic cost. Our  
21 analyses show that, despite metabolic efficiency and temperature robustness constraining circuit parameters, neural  
22 systems can generate functional, efficient, and robust network activity with widely disparate sets of conductances.

---

## 24 Introduction

25 Neural activity arises from the interplay of mechanisms at multiple levels, including single-neuron and network mecha-  
26 nisms. Several experimental and theoretical studies have found that neural systems can produce similar activity from  
27 vastly different membrane and synaptic conductances [1–5], a property sometimes referred to as parameter degen-  
28 eracy [6, 7]. Such parameter degeneracy has been argued to be a prerequisite for natural selection [6] and translates  
29 into potential mechanisms of compensation for perturbations of the systems' parameters [3, 5, 8–13]. However, in  
30 addition to a specific target activity, neural systems are likely subject to additional constraints such as the require-  
31 ment to be energy efficient [14–16]. In order to understand experimentally observed variability and probe potential  
32 compensation mechanisms in functioning neural systems, it is thus crucial to characterise the extent of the systems'  
33 parameter degeneracy under such additional constraints.

34 Neuronal activity accounts for the majority of the energy consumed by the brain [17–19]. Energy is stored in  
35 the ionic gradients across the cell membrane, and consumed mostly by action potentials and synaptic mechanisms.  
36 Maintaining the ionic gradients requires the action of ion pumps, which consume ATP [14, 20]. Previous work has in-  
37 vestigated the metabolic efficiency in small neural systems, often at the single neuron level and with few ion channels

---

\*These authors contributed equally to this work

For correspondence: michael.deistler@uni-tuebingen.de; Jakob.Macke@uni-tuebingen.de; pedro.goncalves@uni-tuebingen.de

38 (often sodium, potassium, and leak) [14, 21, 22]. In these studies, it has been demonstrated that energy consump-  
39 tion of single neurons can be reduced by tuning maximal conductances or time constants of gating variables, while  
40 maintaining electrophysiological characteristics, e.g. spike width. However, questions regarding energy efficiency of  
41 neural systems remain: First, it is unclear whether previous findings in single neurons [23–25] extrapolate to neural  
42 circuits with a large diversity of membrane and synaptic currents [11, 20, 26]. Second, the question of how strongly  
43 metabolic constraints impact parameter degeneracy remains unaddressed: Are energy efficient solutions confined  
44 in parameter space or can disparate network parameters generate energy efficient activity? Lastly, metabolic cost is  
45 only one of many constraints under which neural circuits operate, and it is often unknown whether energy efficiency  
46 trades-off with other constraints (for a study of how energy efficiency trades off with temperature robustness in a  
47 single neuron model of the grasshopper, see Roemschied et al. [27]).

48 Here, we investigate how energy efficiency constrains the parameter degeneracy in the pyloric network in the  
49 stomatogastric ganglion (STG) of the crab *Cancer borealis* [28, 29], a canonical example of a neural system with pa-  
50 rameter degeneracy [5]. The pyloric network produces a triphasic motor pattern, and consists of a pacemaker kernel  
51 (anterior burster neuron, AB, and two pyloric dilator neurons, PD), as well as two types of follower neurons (a single  
52 lateral pyloric, LP, and several pyloric, PY, neurons), interconnected by inhibitory synapses. A model of this circuit with  
53 three model neurons (AB/PD, LP, PY), each with eight membrane currents, and seven inhibitory synapses (Fig. 1a, de-  
54 tails in Methods) has been shown to be capable of producing similar network activity with widely different parameters  
55 [5].

56 We start by characterising the parameter degeneracy of this model: We apply a recently introduced machine learn-  
57 ing tool for simulation-based inference, Sequential Neural Posterior Estimation (SNPE) [13] to estimate the full set of  
58 membrane and synaptic conductances for which the model reproduces experimentally measured electrophysiological  
59 activity. We reduce the number of model simulations required to run SNPE by introducing an additional classifier  
60 which detects and rejects parameter-combinations that produce non-bursting model outputs [30]. After characteris-  
61 ing the parameter degeneracy in the model, we show that disparate circuit configurations can have different energy  
62 consumption despite similar activity. However, a significant parameter degeneracy is present in the model even when  
63 enforcing circuits to have *both* similar activity and low energy consumption. Furthermore, energy consumption is lin-  
64 early predictable from circuit parameters, allowing us to identify tuning mechanisms for low metabolic cost. We then  
65 show that individual neurons in the pyloric network can be tuned separately to minimize their energy consumption,  
66 and thereby achieve low energy consumption at the circuit level. Finally, since the crab *Cancer borealis* is subject  
67 to daily and seasonal fluctuations in temperature, we study the trade-off between metabolic cost and robustness  
68 to changes in temperature [31–34]. We find that metabolic cost can vary across temperatures, but that the pyloric  
69 network can produce functional, energy efficient, and temperature robust activity with disparate parameters.

## 70 Results

### 71 Disparate energy consumption despite similar network activity

72 We studied the metabolic cost in a model of the pyloric network (Fig. 1a). In this model, disparate sets of maximal  
73 membrane and synaptic conductances can give rise to similar network activity [5]. As an example, we simulated  
74 two such circuit configurations (Fig. 1b) and computed their metabolic cost using a previously described measure of  
75 energy consumption [35]. In this measure, the energy for each ion channel is the time integral of the product of the  
76 membrane current and the respective difference between the membrane voltage and the reversal potential. The  
77 energy consumed by the entire neural circuit is the sum of the energies across channels of all neurons (details in  
78 Methods).

79 Although the two simulated circuit configurations produce similar network activity, even at the single-spike level  
80 (Fig. 1c), the total energy consumption (Fig. 1d) as well as the moment by moment energy consumption differ sub-  
81 stantially (Fig. 1e). A closer inspection of the energy consumed by each current in the PY neuron during the action  
82 potentials [36] shows that the difference in energy between these two network configurations is also evident in the  
83 energy consumed by the sodium current Na, the delayed-rectifier potassium current Kd, and the transient calcium  
84 current CaT (Fig. 1f).

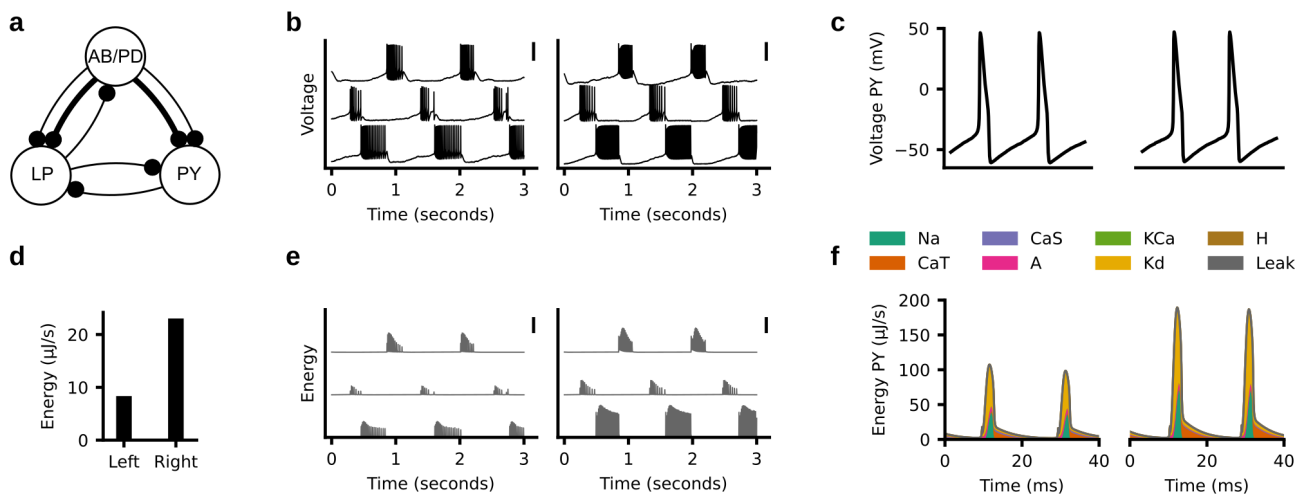

**Figure 1. Similar activity with different energy consumption.** (a) Computational model of the pyloric network consisting of three model neurons (AB/PD, LP, PY) and seven synapses. (b) Two model configurations with similar circuit activity (traces from top to bottom: AB/PD, LP, PY) despite different circuit parameters (parameter values not plotted). Scale bars indicate 50 mV. (c) Close-up of two spikes in the PY neural activity shown in (b). (d) Total energy consumption divided by the duration of the simulation (10 seconds) for the traces shown in (b). The left circuit has 3-fold lower metabolic cost than the right circuit. (e) Consumed energy at each time point. Scale bar indicates 100  $\mu\text{J/s}$ . (f) Energy consumed by each of the ion currents during the two spikes shown in (c).

## 85 Disparity in energy consumption in models matching experimental data

86 The example above illustrates that the model of the pyloric network can, in principle, produce the same activity with  
 87 different metabolic costs. However, it is unclear how broad the range of metabolic costs associated with the same  
 88 network output is. In order to address this, we need to identify the full space of maximal membrane and synaptic  
 89 conductances (31 parameters in total) that match experimental measurements of network activity and to characterise  
 90 the energy consumption of each of these configurations.

91 We used a recently introduced machine learning tool for simulation-based inference, Sequential Neural Posteri-  
 92 or Estimation (SNPE) [13], to estimate the set of circuit parameters (the posterior distribution) consistent with data  
 93 and prior assumptions about the parameters. In SNPE, parameters which specify network configurations are initially  
 94 sampled from the prior distribution (in our case a uniform distribution within plausible parameter ranges) and used  
 95 to simulate network activity. Subsequently, a neural-network based density estimator is trained on these simulated  
 96 network activities to learn which parameter sets produce network activity that is compatible with empirical obser-  
 97 vations. In order to generate the training data for the neural network, SNPE requires millions of model simulations  
 98 to accurately infer the set of data-compatible parameters. To improve the simulation efficiency and make the neu-  
 99 ral network predict parameter sets that more closely match experimental data, we introduced a modification of the  
 100 algorithm (Fig. 2a). Specifically, a technical challenge for SNPE is that parameter sets sampled from the prior distri-  
 101 bution might produce simulation results that are not ‘valid’, i.e. produce clearly non-sensible data: E.g., if there are  
 102 no bursts, phase gaps between bursts are not defined (Fig. 2a, forth panel, red). For SNPE, these ‘invalid’ simulations  
 103 are discarded immediately. In order to reduce the fraction of simulations that are discarded, we introduce a classifier  
 104 to predict whether a parameter set will lead to a ‘valid’ or an ‘invalid’ simulation output [30] (Fig. 2a, second panel).  
 105 Once the classifier is trained on an initial set of simulations, parameters are immediately discarded without running  
 106 the simulation, if the classifier confidently predicts that the simulation will be invalid (details in Methods). We name  
 107 the distribution of parameters that are accepted by the classifier the ‘restricted prior’ (Fig. 2a, third panel). Once  
 108 sufficiently many valid simulations are performed, SNPE proceeds by training a deep neural density estimator to es-  
 109 timate the posterior distribution over parameters of the model [13] (Fig. 2a, last two panels, proof of convergence to  
 110 the correct posterior distribution in Methods).

111 We used this procedure to infer the posterior distribution over maximal membrane and synaptic conductances  
 112 of the model of the pyloric network given salient and physiologically relevant features of experimentally measured  
 113 data. These features are the cycle period, burst durations, duty cycles, phase gaps, and phase delays of the triphasic

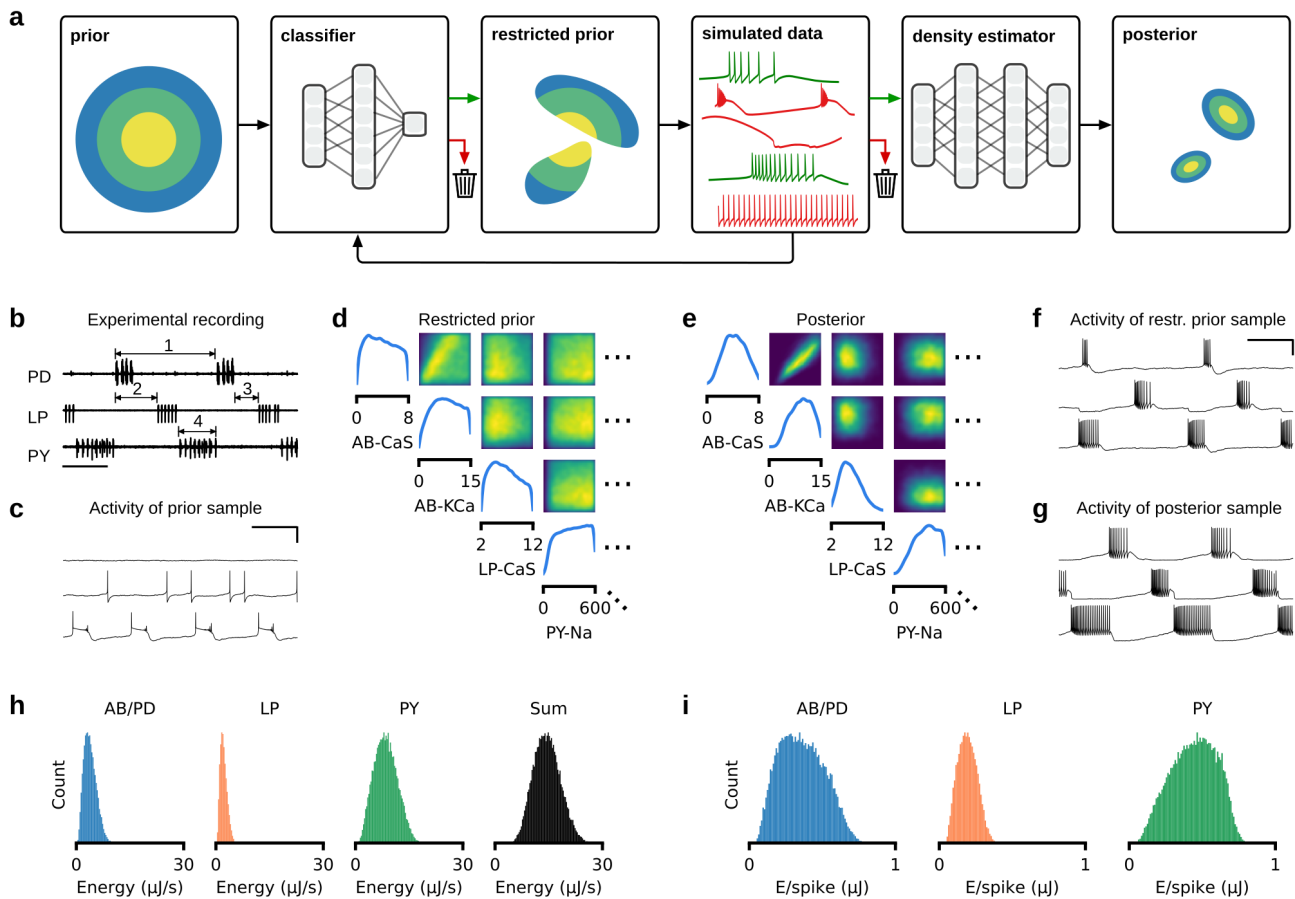

**Figure 2. Bayesian inference reveals wide range of energy consumption.** (a) Inferring the posterior distribution by combining a rejection classifier and a deep neural density estimator. First, a classifier (trained on an initial set of simulations) predicts which circuit parameters sampled from the prior produce ‘valid’ simulation outputs. We then proceed by sampling from the part of the parameter space that is accepted by the classifier, i.e. the ‘restricted prior’. All ‘valid’ data (green) are used to train a deep neural density estimator, all ‘invalid’ data are discarded (red) [13]. Once this estimator is trained, it can be evaluated on experimental data to return the posterior distribution over model parameters. (b) Experimental data recorded from the pyloric network [37]. Arrows indicate a subset of the physiologically relevant features, namely the cycle period (1), phase delays (2), phase gaps (3), and burst durations (4) (see Methods for details). (c) Simulation output from a parameter set sampled from the prior distribution. The traces are: AB/PD (top), LP (middle), PY (bottom). Scale bars correspond to 500 ms and 50 mV. (d) Subset of the marginals and pairwise marginals of the 31-dimensional restricted prior, i.e. the subspace of parameters for which the model produces bursting activity. All maximal conductances are given in  $\text{mS/cm}^2$ . (e) Subset of the marginals and pairwise marginals of the posterior distribution, i.e. the subspace of parameters for which the model matches experimental data shown in panel (b) (full posterior distribution in Appendix 1 Fig. 1). (f) Sample from the restricted prior producing bursting activity but not matching experimental data. (g) Sample from the posterior distribution closely matching features of the experimental data. (h) Histograms over energy consumed by each neuron (blue, orange, green) as well as by entire circuit (black). Trace with lowest energy consumes 9 times less energy than trace with highest energy. (i) Same as in (h), but for energy per spike.

114 rhythm (Fig. 2b, details in Methods) [37]. As in previous studies [4, 5], we did not constrain the model of the pyloric  
 115 network by the number of spikes or the spike shapes. Below, we describe the results obtained for a specific experi-  
 116 mental preparation. We qualitatively reproduced all results with two additional experimental preparations (Appendix  
 117 1 Fig. 10, Appendix 1 Fig. 11, Appendix 1 Fig. 12, Appendix 1 Fig. 13, Appendix 1 Fig. 14, Appendix 1 Fig. 15) [37].

118 When simulating the pyloric network model with parameter sets sampled from the prior distribution, 99% of  
 119 simulations do not produce spikes or bursts and hence characteristic summary features of the circuits are not defined  
 120 (Fig. 2c). The restricted prior (Fig. 2d) is narrower than the prior distribution, but considerably broader than the  
 121 posterior (Fig. 2e, full posterior distribution in Appendix 1 Fig. 1; comparison between prior, restricted prior, and  
 122 posterior in Appendix 1 Fig. 2). Parameters sampled from the restricted prior often produce activity with well-defined  
 123 summary features (Fig. 2f), but do not generally match experimental data, whereas samples from the posterior closely

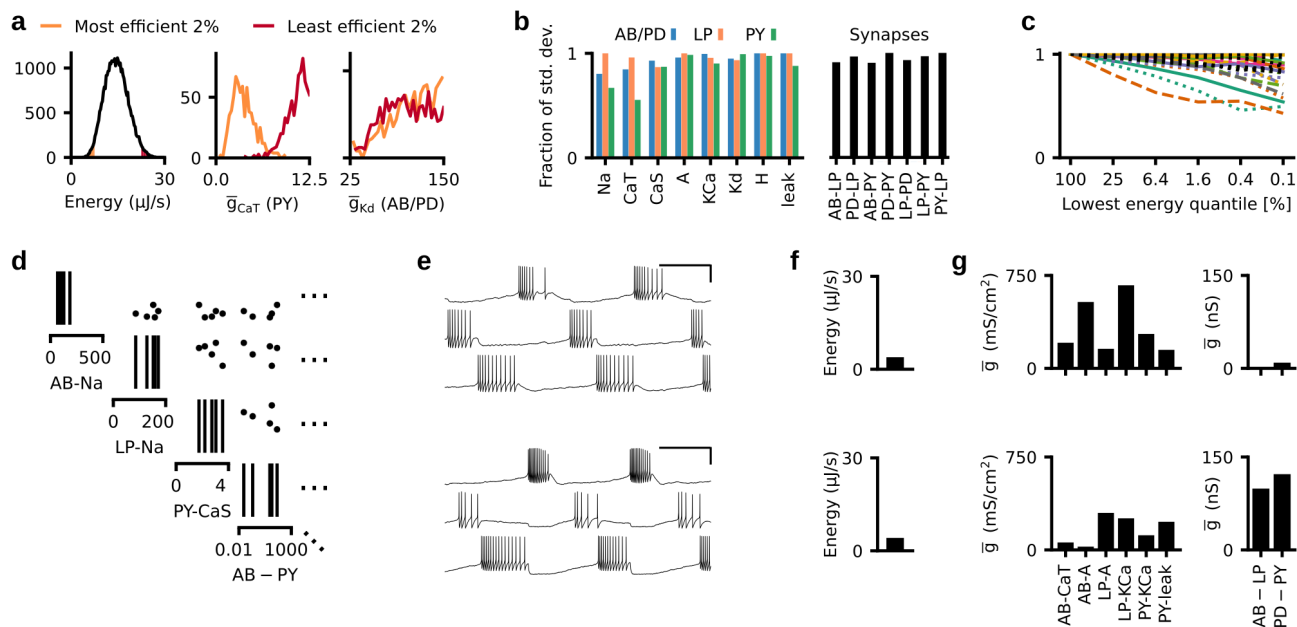

**Figure 3. Metabolic constraints on individual circuit parameters.** (a) Left: Energy consumption of 35,939 models that match experimental data. The orange area corresponds to the energy consumption in the lowest 2% quantile, red area to the top 98% quantile. Middle: Distribution of the maximal conductance of the transient calcium channel (CaT) in the PY neuron in the 2% (orange) and 98% quantile (red). Right: Distribution of the maximal conductance of the delayed-rectifier potassium channel (Kd) in the AB/PD neuron in the 2% (orange) and 98% quantile (red). (b) Standard deviation of parameters for models with energy consumption in the lowest 2% quantile. Standard deviation is normalized to the standard deviation of the parameters across all 35,939 models in our database. (c) Same as panel (b), but for a range of quantiles. Solid: AB/PD, dotted: LP, dashed: PY. Colors are the same as in Fig. 1f. Synapses in black. (d) Subset of the parameter values of the five most efficient circuit configurations in our database. (e) The network activity produced by two of these five configurations. Scale bar indicates 500 ms and 50 mV. (f) The energy consumption of the two configurations shown in panel (d). (g) Subset of circuit parameters of the two solutions shown in panel (b). Despite similar network activity and low energy consumption, several parameters differ by more than 2-fold. The membrane conductances are scaled by the following factors (left to right): 100, 10, 10, 100, 100, 10000.

124 match experimental data (Fig. 2g). By using the classifier to reject ‘invalid’ simulations, we required half as many  
 125 simulations compared to ‘classical’ SNPE [13] and achieved a higher accuracy (Appendix 1 Fig. 3). For the subsequent  
 126 analyses, we only considered posterior samples whose activity was within a prescribed distance to the experimental  
 127 data, and discarded all other samples (details in Methods). We simulated 1 million parameter configurations sampled  
 128 from the posterior, out of which approximately 3.5% fulfilled the distance criterion, leading to a database of 35,939  
 129 parameter sets whose activity closely matched experimental data. Sampling from the prior distribution rather than  
 130 the posterior would have required approximately 600 billion simulations to obtain 35,939 parameter sets that fulfill  
 131 our criterion (60,000 times more than with our method).

132 We computed the energy consumption of each of the 35,939 circuit activities (Fig. 2h). The circuit configuration  
 133 with lowest total energy consumes nine times less energy than the circuit configuration with highest total energy.  
 134 To ensure that the difference in energy does not only stem from different numbers of spikes within a burst, we also  
 135 computed the average energy consumed during a spike (energy per spike) in each of the neurons (Fig. 2i). As with total  
 136 energy, energy per spike strongly varies across parameter configurations. These results show that, despite similar  
 137 circuit function, different parameter sets can have vastly different energy consumption. Below, we investigate the  
 138 mechanisms giving rise to this phenomenon.

### 139 Metabolic constraints on individual circuit parameter ranges

140 How strongly does enforcing low energy consumption constrain the permissible ranges of circuit parameters? We  
 141 inspected the circuit parameters of the 2% most and least efficient configurations within our database of 35,939  
 142 model configurations (Fig. 3a, left). For some circuit parameters, the range of values producing efficient activity is  
 143 clearly different from the range of values producing energetically costly activity (e.g. the maximal conductance of the

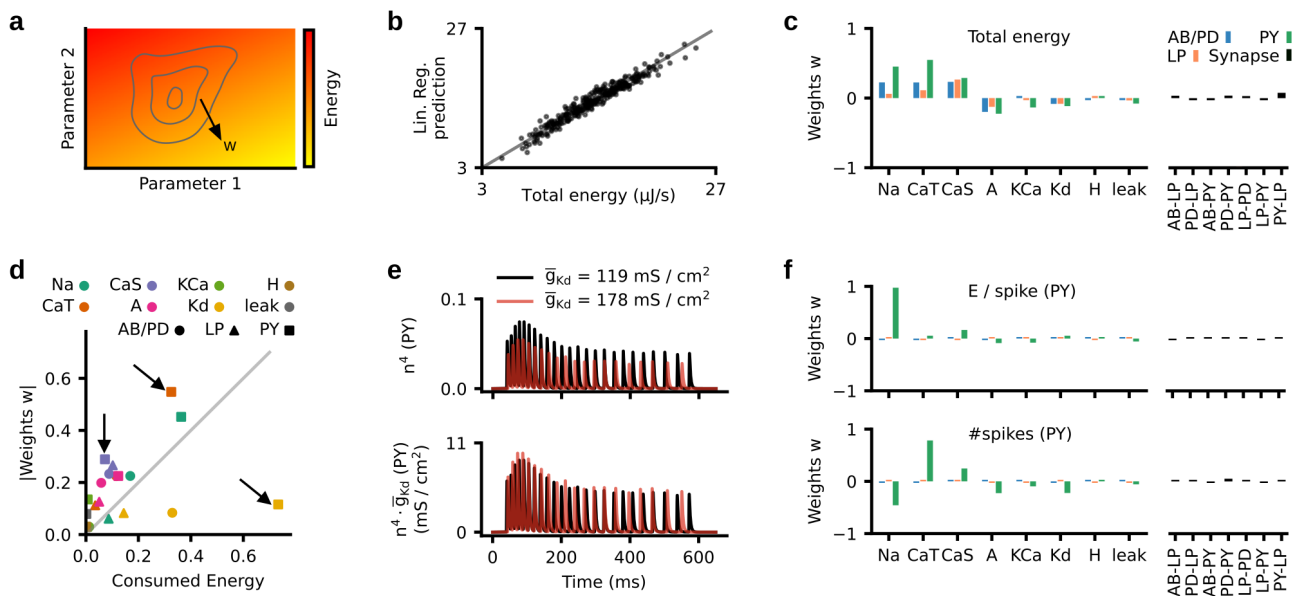

**Figure 4. Influence of circuit parameters on energy consumption.** (a) Illustration of the energy landscape under functional constraints (matching experimental activity). The linear regression weights correspond to the direction along which energy varies. (b) The linear regression accurately predicts the energy consumption on a test set of 300 circuit configurations (black dots). Grey line is the identity function. (c) Weights  $w$  of the linear regression. Left: Weights of the maximal membrane conductances. Right: Weights of the maximal synaptic conductances. (d) Weights  $w$  as a function of energy consumption (both normalized), for all membrane currents (arrows highlight three illustrative examples). Membrane conductances on the top left consume little energy, but their maximal conductances correlate strongly with energy consumption. Conductances on the bottom right consume a lot of energy, but their maximal conductances correlate weakly with energy consumption. (e) Top: The gating variable  $n^4$  of the Kd current in the PY neuron during activity produced by two circuit configurations (black and red) which are identical apart from the magnitude of  $\bar{g}_{Kd}$ . Bottom: The product of gating variable and maximal conductance  $n^4 \cdot \bar{g}_{Kd}$  for the same configurations. (f) Top: Weights of a linear regression onto the energy per spike in the PY neuron. Bottom: Weights of a linear regression onto the number of spikes in the PY neuron.

144 transient calcium current in the PY neuron, Fig. 3a, middle). For other parameters, the range does not change (e.g. the  
 145 maximal conductance of the delayed-rectifier potassium current in the AB/PD neuron, Fig. 3a, right). To quantify how  
 146 strongly low energy consumption constrains parameters, we compared the parameter standard deviation across all  
 147 35,939 model configurations to that of the most efficient 2% (Fig. 3b,c). Most parameters in the circuit barely get  
 148 constrained by energy consumption (values close to one in Fig. 3b,c). The parameters that get constrained the most  
 149 by enforcing low energy consumption are the Na and CaT conductances of the AB/PD neuron, the CaS conductance  
 150 of the LP neuron, and the Na, CaT, CaS, and leak conductances of the PY neuron. However, for all of these parameters,  
 151 a large fraction of variability remains.

152 In order to ensure that the remaining variability of circuit parameters does not stem from the remaining vari-  
 153 ability of energy consumptions within the lowest 2% quantile, we inspected the five most efficient configurations in  
 154 our database of 35,939 model configurations. Even these five circuit configurations have strongly disparate circuit  
 155 parameters (Fig. 3d). Despite having similar activity (Fig. 3e) and very low (and similar) metabolic cost (Fig. 3f), their  
 156 circuit parameters are disparate (Fig. 3g). These results demonstrate that metabolic efficiency constrains the range  
 157 of some circuit parameters, but it is possible to achieve low metabolic cost and similar network activity with widely  
 158 disparate circuit parameters.

### 159 Energy consumption can be linearly predicted from circuit parameters

160 We wanted to understand how each circuit parameter affects energy consumption. We performed a linear regression  
 161 from circuit parameters (taken from our database of 35,939 model configurations) onto the energy consumption of  
 162 these circuits (Fig. 4a). This linear regression achieved a high accuracy, demonstrating that energy consumption  
 163 can be linearly predicted from circuit parameters (Fig. 4b; a non-linear regression with a neural network leads to  
 164 similar results and is shown in Appendix 1 Fig. 4; details in Methods). The regression weights  $w$  indicate how strongly

165 energy consumption is correlated with each parameter value (Fig. 4c). The maximal sodium conductance  $\bar{g}_{Na}$  and the  
166 transient calcium conductance  $\bar{g}_{CaT}$  of the AB/PD and PY neuron as well as the slow calcium conductance  $\bar{g}_{CaS}$  of the  
167 AB/PD, LP, and PY neuron are most strongly correlated with energy consumption: Increases of these conductances are  
168 associated with an increase in energy consumption, and thus, small conductance values correspond to metabolically  
169 more efficient solutions. The synaptic conductances are weakly correlated with energy consumption, which can be  
170 explained by the low values of the maximal synaptic conductances: The synaptic strengths range up to 1000 nS,  
171 whereas the membrane conductances can range up to 0.4 mS (i.e.  $4 \cdot 10^5$  nS), such that synapses consume only  
172 0.08% of the total energy in the circuit. These results demonstrate that energy consumption can be linearly predicted  
173 from circuit parameters, and that energy consumption is most strongly correlated with the maximal conductances  
174 of sodium as well as slow and transient calcium.

175 How do different currents affect total energy consumption? Do they directly consume energy, or do they trigger  
176 processes that then require energy? We addressed these questions by comparing the fraction of energy consumed  
177 by each current (as defined by our measure of energy [35], Fig. 1f) to the linear regression weight  $w$  associated with  
178 its maximal conductance (Fig. 4d). We found that some currents consume a lot of energy, although their maximal  
179 conductances barely correlate with energy consumption, e.g. the Kd current in the PY neuron (Fig. 4d, bottom right  
180 arrow), while other currents consume little energy, but nonetheless their maximal conductances are correlated with  
181 energy consumption, e.g. the CaS and CaT currents of the PY neuron (Fig. 4d, top left arrows).

182 We investigated the neuronal mechanisms that give rise to these behaviors. First, to understand how currents  
183 can consume large amounts of energy despite their maximal conductance only weakly correlating with energy, we in-  
184 vestigated the effects of the delayed-rectifier potassium conductance  $\bar{g}_{Kd}$  on circuit activity. We simulated two circuit  
185 configurations, identical apart from the magnitude of  $\bar{g}_{Kd}$  in the PY model neuron. In the configuration with higher  
186  $\bar{g}_{Kd}$ , the gating variable  $n$  did not reach as high values as for the other configuration, thus leading to a similar effective  
187 conductance  $n^4 \cdot \bar{g}_{Kd}$  (Fig. 4e). This demonstrates that changes in the maximal conductance  $\bar{g}_{Kd}$  only weakly influence  
188 the current and thereby the energy consumption. Thus, despite the potassium current consuming a lot of energy due  
189 to a large flow of ions (compared to other channels), its maximal conductance  $\bar{g}_{Kd}$  only weakly correlates with energy  
190 consumption. Second, to understand how maximal conductances can correlate with energy consumption despite  
191 their channels consuming little energy, we disentangled the correlation of circuit parameters with energy consump-  
192 tion into two parts: The energy *per spike* and the number of spikes. We fitted two additional linear regression models:  
193 One regression from circuit parameters onto number of spikes in the PY neuron and one regression from circuit  
194 parameters onto energy per spike in the PY neuron. We again found good predictive performance of these models,  
195 showing that the energy per spike and the number of spikes can also be linearly predicted from circuit parameters (re-  
196 gression performance in Appendix 1 Fig. 5). The energy per spike is strongly correlated with the sodium conductance  
197 (Fig. 4f, top), whereas the number of spikes is most strongly correlated with the maximal conductance of transient  
198 calcium (also with sodium, slow calcium, and transient potassium conductances, Fig. 4f, bottom). This demonstrates  
199 that increases in the maximal conductance of transient calcium lead to a higher number of spikes, which involve  
200 increased energy consumption through other currents. We verified this hypothesis by simulating two configurations  
201 that were identical apart from the magnitude of  $\bar{g}_{CaT}$  in the PY model neuron and found that the configuration with  
202 higher  $\bar{g}_{CaT}$  indeed produced more spikes per burst (Appendix 1 Fig. 6). This shows that, despite the calcium chan-  
203 nel consuming little energy itself, increasing  $\bar{g}_{CaT}$  can lead to higher energy consumption by increasing the number  
204 spikes, which involve energy consumption through other currents (mostly sodium and potassium). Overall, our anal-  
205 yses demonstrate that currents which consume a lot of energy are not necessarily the ones that influence energy the  
206 most.

## 207 Minimal tuning mechanisms for low energy consumption

208 We identified circuit parameters that correlate with energy consumption, but this does not yet address the question  
209 of which changes of these parameters will lead to the reduction of energy consumption: First, a correlation between  
210 parameter values and energy consumption does not imply a causal connection between these. Second, parameters  
211 that correlate strongly with energy consumption might have to be finely tuned to match the pyloric rhythm, thus not  
212 constituting a feasible substrate for reducing energy consumption. Therefore, we went beyond the previous anal-  
213 ysis to investigate potential tuning mechanisms involving single and pairs of parameters that would reduce energy  
214 consumption while maintaining the pyloric rhythm.

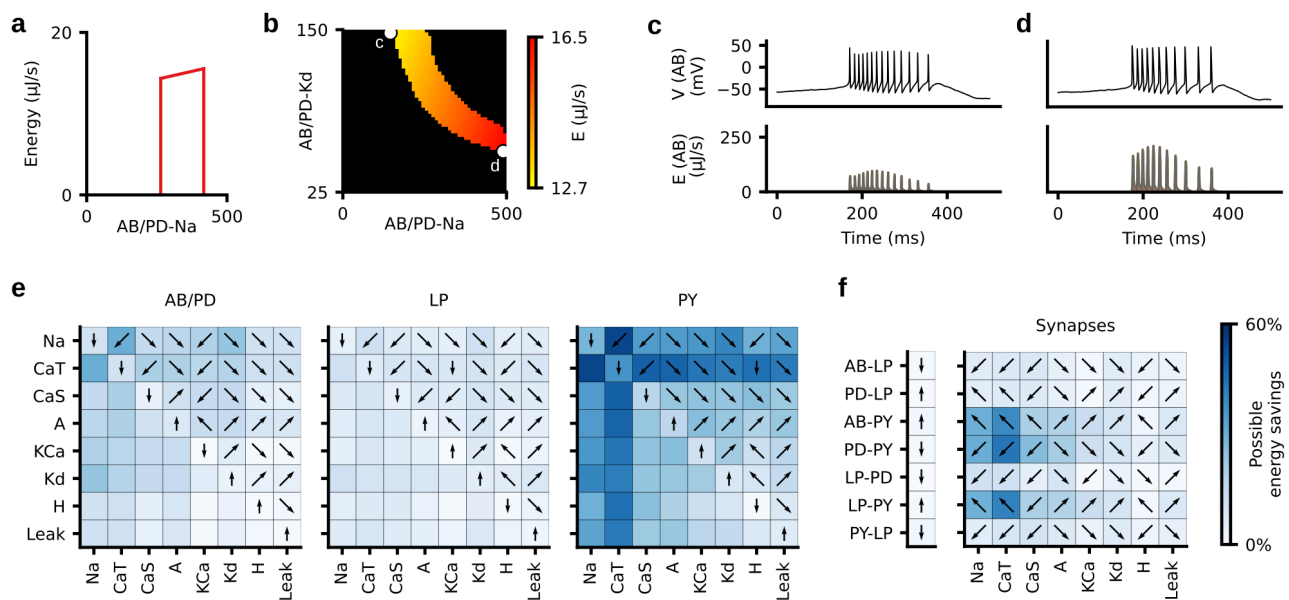

**Figure 5. Minimal tuning mechanisms for low energy consumption.** (a) Energy consumption (as predicted by linear regression) of several models that differ only in their maximal sodium conductance in the AB/PD neuron. Energy increases with  $\bar{g}_{Na}$ . We excluded circuits with too low and too high values of  $\bar{g}_{Na}$ , for which the model does not reproduce experimental data. (b) Same as panel (a), but for models that differ in their maximal conductances of sodium (Na) and delayed-rectifier potassium (Kd) in the AB/PD neuron. (c) Top: Voltage trace of the AB/PD neuron for the most efficient configuration within the plane shown in panel (b). Bottom: energy consumption during that activity. (d) Same as panel (c), but for the least efficient configuration. (e) Fraction of energy that can be saved by modifying a single membrane parameter (diagonal of each matrix) or pairs of membrane parameters (upper and lower diagonal). Colorbar as in panel (f). Arrows indicate the direction in which (pairs of) parameters should change in order to reduce energy: Left/right refers to the parameter on the x-axis, top/bottom refers to the parameter on the y-axis. (f) Fraction of energy that can be saved by modifying a synaptic conductance (vector on the left) or the synaptic conductance and one membrane conductance of the respective postsynaptic neuron (matrix on the right).

215 We investigated how strongly energy consumption could be reduced by mechanisms that involve a single param-  
 216 eter. For instance, we kept all parameters but the maximal sodium conductance of the AB/PD neuron ( $\bar{g}_{Na}$ ) constant  
 217 and varied  $\bar{g}_{Na}$  on a grid. We then estimated the energy consumption of each configuration with the previously iden-  
 218 tified linear model (Fig. 4). The energy consumption of the circuit increases with  $\bar{g}_{Na}$ . However, for too low (or too  
 219 high)  $\bar{g}_{Na}$ , the network activity does not match experimental data (we rejected parameters for which the posterior  
 220 density is too low, see Methods). Thus, despite  $\bar{g}_{Na}$  strongly correlating with energy consumption (Fig. 4c), energy  
 221 consumption can be reduced only modestly when tuning  $\bar{g}_{Na}$  and keeping all other parameters constant.

222 We then investigated whether pairwise mechanisms could lead to larger savings in energy consumption. For in-  
 223 stance, we kept all parameters but  $\bar{g}_{Na}$  and the delayed-rectifier potassium conductance of the AB/PD neuron ( $\bar{g}_{Kd}$ )  
 224 constant and varied the remaining two parameters on a grid. We estimated the energy consumption of any confi-  
 225 guration on this grid and found that the most efficient parameter configuration is 23% more efficient than the most  
 226 wasteful configuration (Fig. 5b). This reduction in energy consumption could be achieved through a simple pairwise  
 227 mechanism: A reduction of sodium combined with an increase of potassium allows the network to maintain its activity  
 228 (Fig. 5c,d), while reducing the metabolic cost (Fig. 5b).

229 We repeated this analysis for every conductance and every pair of conductances (Fig. 5e,f). Note that we only  
 230 considered pairs of parameters within each neuron because pairwise compensation mechanisms across neurons  
 231 have been shown to be weak in this model [13]. Some of the single-conductance mechanisms can reduce the energy  
 232 consumption by up to 36%. Pairwise mechanisms, such as reducing the sodium and transient calcium conductances  
 233 of the PY neuron, can reduce the energy consumption of the entire circuit by up to 55%. When considering only the  
 234 energy consumed in a specific neuron, pairwise mechanisms can reduce energy consumption by up to 80% (Appendix  
 235 1 Fig. 7). Finally, pairwise mechanisms between synapses and conductances of the respective postsynaptic neurons  
 236 can reduce energy consumption of the entire circuit by up to 43%.



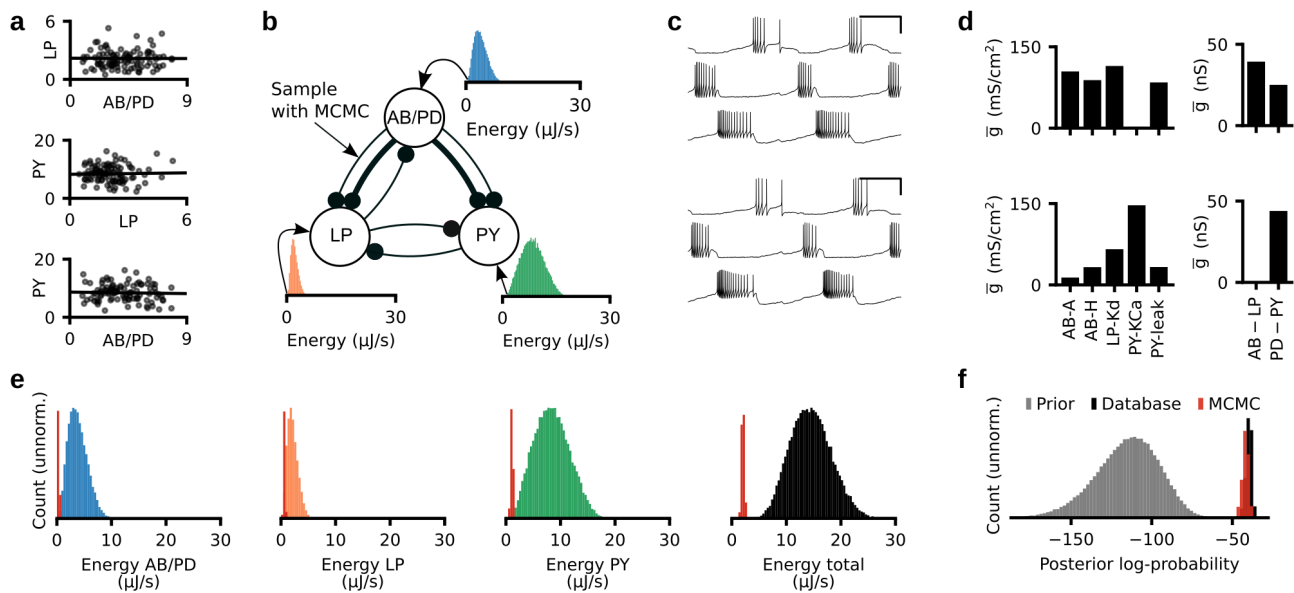

**Figure 6. Neurons can be tuned individually to achieve minimal circuit energy consumption.** (a) Black dots: Energy consumed by each neuron separately. 100 randomly selected parameter configurations from our database of 35,939 configurations. Black line: Linear regression shows a weak correlation between the energy consumed by pairs of neurons. (b) We select the five most efficient parameter configurations for each neuron separately, and search with Markov chain Monte Carlo (MCMC) for synaptic conductances such that the target circuit activity is achieved. (c) The activity produced by two parameter configurations produced with the strategy described in (b). (d) A subset of the membrane (left) and synaptic (right) conductances for the configurations in (c). Despite generating similar network activity, the configurations have very different circuit parameters. The membrane conductances are scaled with the following factors (left to right): 10, 10000, 1, 100, 10000. (e) Histogram over the energy consumption of all 35,939 models in our database (blue, orange, green, black) and the energy consumption of the configurations produced with the strategy described in panel (b) (red). (f) Histogram of the posterior log-probability for samples from the prior distribution (grey), for the 35,939 models in our database (black), and for the configurations produced with the strategy described in panel (b) (red).

237 These analyses provide hypotheses for causal mechanisms for how neurons can be tuned into low-energy regimes,  
 238 while the neural activity keeps satisfying functional constraints. We demonstrated that even simple mechanisms  
 239 involving one or two conductances can have a substantial impact on the energy consumption of the circuit—thus,  
 240 low-energy configurations can be found with ‘local’ parameter changes, not requiring fine coordination amongst  
 241 multiple parameters.

## 242 **Neurons can be tuned individually to achieve minimal circuit energy**

243 Next, we asked how single neurons interact to produce functional and efficient circuit activity. Can the energy of the  
 244 entire circuit be minimized by optimizing the energy of each neuron individually? And does the circuit retain functional  
 245 activity when neurons are individually optimized for low energy efficiency? Within our database of 35,939 model  
 246 configurations, there is a weak correlation between the energies consumed by pairs of neurons, which suggests  
 247 that the energy consumption between neurons might be independent from one another (Fig. 6a; AB/PD versus LP,  
 248 correlation coefficient  $r = -0.006$ , p-value  $p = 0.23$ ; LP versus PY,  $r = 0.02$ ,  $p = 3 \cdot 10^{-6}$ ; AB/PD versus PY,  $r = -0.03$ ,  $p =$   
 249  $8 \cdot 10^{-9}$ ). We thus investigated whether we could optimize the parameters of each neuron individually for low energy  
 250 consumption and still retain functional circuit activity. We searched our database of 35,939 model configurations for  
 251 the single neuron models with minimal energy consumption individually. We selected the five most efficient single  
 252 neuron parameter combinations for each of the neurons and assembled them into 125 ( $5^3$ ) network configurations.  
 253 We then identified synaptic conductances that match each of these configurations with Markov chain Monte Carlo  
 254 (Fig. 6b, details in Methods). Notably, given the already estimated full posterior distribution, this step does not require  
 255 additional simulations.

256 For each of the 125 combinations of membrane conductances, we found a set of synaptic conductances for which  
 257 the network activity closely resembles experimentally measured activity (Fig. 6c). The resulting configurations have

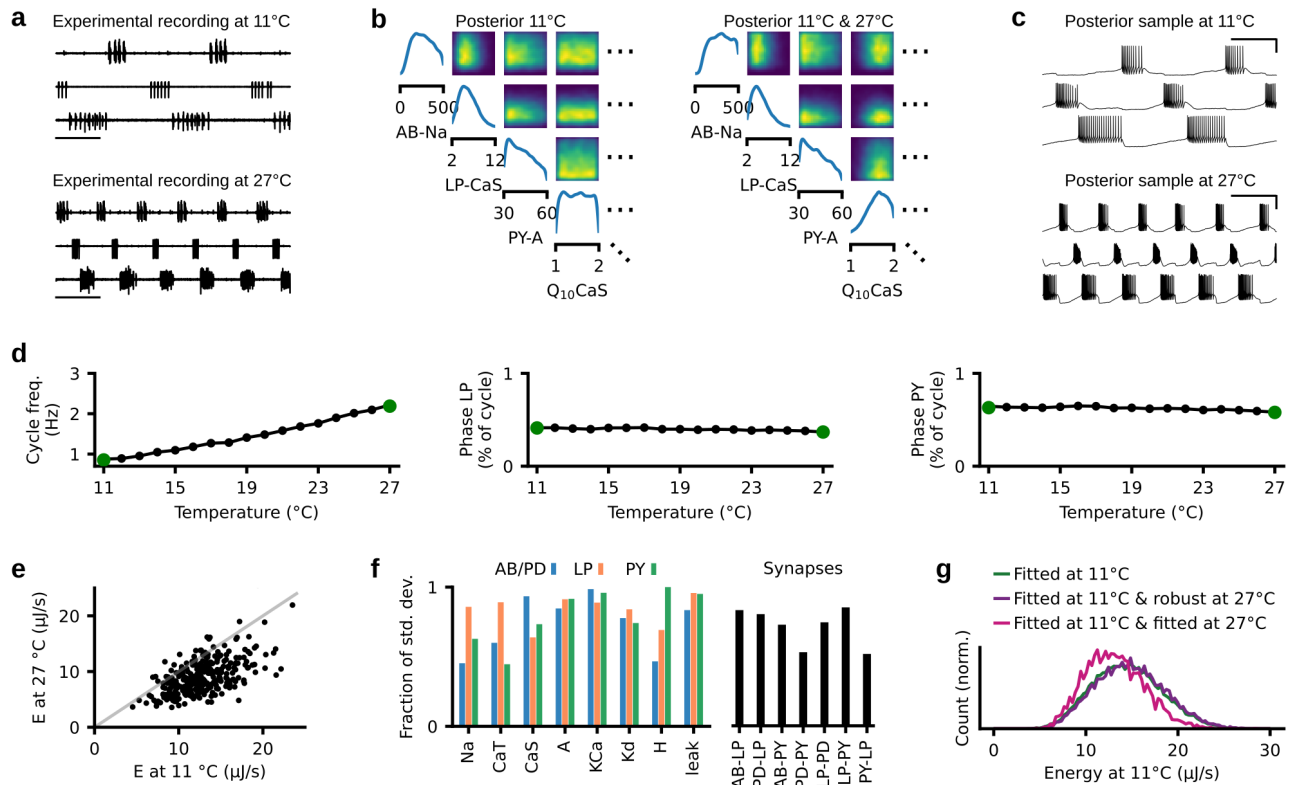

**Figure 7. Temperature robustness does not preclude energy efficiency.** (a) Top: Experimental data at 11°C. Bottom: Experimental data at 27°C [37]. (b) Left: Posterior distribution given experimental data at 11°C. Right: Posterior given experimental data at 11°C and 27°C. (c) Simulations for a parameter set drawn from the posterior distribution matching experimental data at 11°C and 27°C. Simulations at 11°C (top) and 27°C (bottom). (d) Cycle frequency (left), phase of LP neuron (middle) and phase of PY neuron (right) for parameter set shown in panel (c), simulated at temperatures between 11°C and 27°C. Green dots are the values of the experimental preparations. (e) Energy consumption at 11°C versus 27°C for 967 circuits sampled from the posterior (in (b) right). In grey, the identity line. (f) Standard deviation of parameters for models that match experimental data at 11°C and 27°C and that have energy consumption in the lowest 2% quantile at 11°C and 27°C. Standard deviation is normalized to the standard deviation of the parameters across all 35,939 models in our database. (g) Green: Distribution of the energy consumption of circuits matching experimental data at 11°C. Purple: Distribution of the energy consumption of circuits that match data at 11°C and are robust at 27°C. Pink: Distribution of the energy consumption of circuits that match experimental data at 11°C and 27°C.

258 disparate parameters (Fig. 6d) but highly similar network activity. Furthermore, we found that the resulting configura-  
 259 tions have similar and very low energy consumption. The energy consumption of these circuits is significantly smaller  
 260 than that of any of the configurations in our database of 35,939 model configurations (Fig. 6e). This demonstrates  
 261 that optimizing a specific neuron for energy efficiency does not preclude the connected neurons from being energy  
 262 efficient. Thus, our results suggest that the pyloric network can be optimized for energy efficiency by tuning neurons  
 263 individually for low energy consumption.

264 We estimated how likely are these energy-efficient circuits under the estimated posterior. We found that all these  
 265 models have similar posterior log-probability as the 35,939 model configurations in our database (Fig. 6f), i.e. these  
 266 are as likely to underlie the experimentally measured activity as the database models. Thus, the low-energy configura-  
 267 tions were not sampled when generating our original model database because of the high dimensionality of the  
 268 parameter space, and we cannot exclude the possibility that there might be unsampled regions in parameter space  
 269 with even more energy-efficient circuit configurations.

## 270 Robustness to temperature does not require an increased metabolic cost

271 The crab *Cancer borealis* experiences daily and yearly fluctuations in temperature which in turn influence the chemical  
 272 and physical properties of neurons [31–33]. Nonetheless, neural circuits such as the pyloric network can maintain  
 273 their functionality in the presence of these temperature variations. As temperature increases, the cycle frequency of

274 the circuit increases exponentially, but the phases between bursts remain relatively constant [34, 38]. We investigated  
275 whether the pyloric network trades off robustness to changes in temperature with energy efficiency, i.e. whether  
276 temperature-robust solutions are more energetically costly.

The temperature-dependence of a biophysical parameter  $R$  is captured by the  $Q_{10}$  value and is defined as follows:

$$R_T = R_{ref} Q_{10}^{(T-T_{ref})/10},$$

277 where  $R_{ref}$  is the parameter value at the reference temperature  $T_{ref} = 11^\circ\text{C}$ . We extended the model of the pyloric  
278 network to include  $Q_{10}$  values for all maximal membrane and synaptic conductances (details in Methods) [39, 40]. We  
279 then used SNPE to identify all maximal membrane and synaptic conductances, as well as the associated  $Q_{10}$  values  
280 (41 parameters in total) that match experimental recordings at  $11^\circ\text{C}$  and  $27^\circ\text{C}$  (Fig. 7a) [37]. We set the previously  
281 identified posterior distribution (Fig. 2e) over circuit parameters given experimental data at  $11^\circ\text{C}$  as the new prior  
282 distribution, and then applied SNPE to match the model with experimental data at  $27^\circ\text{C}$  (Fig. 7b, full posterior in Ap-  
283 pendix 1 Fig. 8, details in Methods). We sampled circuit parameters and  $Q_{10}$  values from the resulting distribution  
284 and selected samples whose activity closely matched experimental data at  $11^\circ\text{C}$  and  $27^\circ\text{C}$  (Fig. 7c). Overall, we gen-  
285 erated a database of 967 sets of circuit parameters and  $Q_{10}$  values. When simulating at temperatures between  $11^\circ\text{C}$   
286 and  $27^\circ\text{C}$ , these circuits show the characteristic exponential increase in cycle frequency as well as the constant phase  
287 relationship between bursts observed experimentally (Fig. 7d) [34].

288 We asked whether the energy consumed by the circuit at  $11^\circ\text{C}$  is proportional to the energy consumed at  $27^\circ\text{C}$ .  
289 We found that, despite the number of spikes in our model being higher at higher temperatures, the total energy  
290 consumption is lower at  $27^\circ\text{C}$  (Fig. 7e; note that, for one of the three preparations, the energy consumptions at  
291  $11^\circ\text{C}$  and  $27^\circ\text{C}$  are similar; see Appendix 1 Fig. 15). This occurs because at higher temperatures, the increase in  
292 the number of spikes is accompanied by an increase in channel time constants and respective decrease in energy  
293 per spike (Appendix 1 Fig. 9). In addition, there is a clear correlation between energy consumptions at  $11^\circ\text{C}$  and  $27^\circ\text{C}$   
294 (Pearson-correlation coefficient: 0.66), although circuit configurations with similar efficiency at  $11^\circ\text{C}$  can show a range  
295 of energy consumptions at  $27^\circ\text{C}$  (Fig. 7e).

296 We then investigated how the additional constraint of temperature robustness impacts the parameter degeneracy  
297 of the pyloric network. We computed the standard deviation of models that match experimental data at  $11^\circ\text{C}$  and  
298  $27^\circ\text{C}$  and whose energy consumption is in the 2% quantile at both temperatures (Fig. 7f). The resulting standard  
299 deviation is smaller than that of all models in our database of 35, 939 models, but a large parameter variability remains.  
300 Thus, we found a substantial parameter degeneracy in circuits constrained by “pyloric-ness”, energy efficiency and  
301 temperature robustness.

302 Does temperature robustness have an influence on metabolic cost? We computed the energy consumed at  $11^\circ\text{C}$   
303 for three different scenarios: First, for all models in our database of 35, 939 model configurations matching experimen-  
304 tal data recorded at  $11^\circ\text{C}$  (same as Fig. 2h). Second, for all models in our database of 35, 939 model configurations  
305 that are also functional at  $27^\circ\text{C}$  (i.e. produce triphasic activity). Third, for all models in our database of 967 model  
306 configurations matching experimental data recorded at  $11^\circ\text{C}$  and  $27^\circ\text{C}$ . In all three of these scenarios, the distribu-  
307 tion of metabolic cost was similar (Fig. 7g. Note that the slightly different average energy consumption between the  
308 first and the third scenario occurred only in two of the three preparations, see Appendix 1 Fig. 12 and Appendix 1  
309 Fig. 15). In particular, all three scenarios contained configurations that produce energy efficient circuit function. This  
310 demonstrates that enforcing temperature robustness does not require the pyloric network to be less energy efficient.

311 Overall, our analyses indicate that the model of the pyloric network retains substantial parameter degeneracy  
312 despite constraints on energy efficiency and temperature robustness. In addition, we showed that temperature  
313 robustness does not entail additional metabolic cost.

## 314 Discussion

315 Neural systems undergo environmental and neuromodulatory perturbations to their mechanisms. The parameter  
316 degeneracy of neural systems, i.e. the ability to generate similar activity from disparate parameters, confers a certain  
317 degree of robustness to such perturbations [6–9, 41, 42]. However, not all system configurations might be equally  
318 desirable, with some configurations being more energy efficient than others [14]. Here, we analysed the energy con-  
319 sumption of parameter configurations with similar activity in the pyloric network of the stomatogastric ganglion. We

320 found that, even when the network activity is narrowly tuned to experimental data, the energy consumption can  
321 strongly vary between parameter configurations. Despite this diversity of metabolic costs, energy efficient activity  
322 could be produced from a wide range of circuit parameters. When characterising the range of data-consistent pa-  
323 rameters, we found a linear relationship between circuit parameters and energy consumption, which allowed us to  
324 identify tuning mechanisms for low energy consumption. Lastly, we showed that temperature robustness does not  
325 preclude energy efficiency and that parameter degeneracy remains despite metabolic and temperature constraints.  
326 These findings were facilitated by a methodological advance that increased the efficiency of previously published  
327 tools for simulation-based inference [13, 30, 43, 44].

### 328 **Parameter degeneracy under multiple constraints**

329 In addition to a specific activity, neural circuits are likely constrained by other requirements, e.g. low energy con-  
330 sumption or robustness to perturbations such as fluctuations in temperature or pH [34, 39, 40, 45–49]. Here, we in-  
331 vestigated how energy efficiency impacts the parameter degeneracy of neural systems. While a plausible hypothesis  
332 would have been that energy efficiency reduces or eliminates degeneracy altogether, here we found that parameter  
333 degeneracy is preserved, even within circuits with very low energy consumption.

334 In our work, parameter degeneracy consisted in the range of pyloric-network models that match specific features  
335 of experimental activity. We used the same features as in previous work [5], which are physiological constraints of  
336 the pyloric network, e.g. cycle duration, burst durations, and gaps and phases of bursts. However, we cannot discard  
337 the possibility that the inclusion of additional data-features (e.g. spike height or spike width) would have impacted  
338 parameter degeneracy and consequently also the range of energies.

339 Previous work demonstrated that multiple parameter sets in a model of the AB/PD neuron are temperature robust  
340 [39]. Here, we investigated the interplay between energy consumption and temperature robustness at the circuit  
341 level, and showed that functional, energy efficient, and temperature robust activity can be generated from disparate  
342 circuit parameters. In addition, consistent with previous work in a single neuron model of the grasshopper [27],  
343 we found that temperature robustness does not require an increased metabolic cost. Whether these results will  
344 generalize with the inclusion of the robustness to additional external perturbations, e.g. pH fluctuations [48, 50], or  
345 internal perturbations, e.g. neuromodulation [38], remains a subject for future work.

### 346 **Relation to previous work on metabolic cost of neural systems**

347 There has been extensive work on quantifying the metabolic cost of biophysical processes in single neurons [14, 21–  
348 25], and how single neurons subject to functional constraints can be tuned to minimize energy consumption [14, 22,  
349 24]. Consistent with this work, we found that total energy consumption of the pyloric network is strongly influenced  
350 by the sodium current [24], but also by the transient and slow calcium currents. The maximal sodium conductance  
351 is the most prominent driver of the energy per spike: Increases in the conductance lead to an increase of metabolic  
352 cost per spike [14, 24]. In contrast, calcium currents influence energy consumption through the number of spikes  
353 within a burst, despite not consuming much energy themselves. Our results suggest that the maximal conductances  
354 of sodium and calcium might be regulated for metabolic efficiency. We thus predict that these conductances are less  
355 variable in nature than expected by computational models only matching network activity. Nevertheless, we should  
356 note that our findings are based on two simplifying assumptions: First, we studied simple single-compartment neu-  
357 rons rather than more realistic multi-compartment neuron models [51]; and second, the energy measure is derived  
358 directly from the Hodgkin-Huxley model [35], rather than taking into account all the complexity of the ionic exchange  
359 leading to ATP consumption [14, 20, 22, 24].

360 Previous studies have demonstrated that synaptic mechanisms can consume a substantial amount of energy  
361 [20, 52, 53]. In contrast, in the considered model of the pyloric network, synaptic currents consume only a minor  
362 fraction of energy (approximately 0.08% of the total energy is consumed by synapses, whereas Attwell and Laughlin  
363 [20] report 40% of energy per action potential being consumed by synaptic mechanisms). This difference is largely  
364 due to the low number of connections in the pyloric network [54]: Each neuron projects to up to two other model  
365 neurons, whereas the synaptic energy consumption reported in Attwell and Laughlin [20] is based on the assumption  
366 of 8000 synaptic boutons per neuron. Thus, models of more complex neural circuits driven by excitatory, recurrent  
367 connectivity, such as the ones found in the cortex, might spend a larger fraction of energy on synaptic mechanisms.

### 368 **Increasing the efficiency of simulation-based inference**

369 We used a previously introduced tool, SNPE [13, 44] to identify all models consistent with experimentally measured  
370 activity as well as prior knowledge about realistic parameter ranges. We improved the efficiency of the method by  
371 introducing a classifier that rejects ‘invalid’ simulations [30]. By using this classifier, we were able to improve the  
372 accuracy of SNPE while requiring only half as many simulations [13]. Because of this larger simulation-budget, the  
373 resulting posterior distributions became more accurate. Furthermore, the trained neural density estimator is amor-  
374 tized, i.e. one can obtain the posterior distribution for multiple experimental preparations without running further  
375 simulations or training a new neural network.

376 The classifier-enhanced SNPE can be applied to other modelling studies in neuroscience. In particular, the clas-  
377 sifier to predict ‘invalid’ simulations is valuable whenever there are parameter values for which the computational  
378 model of interest produces ill-defined features: E.g. the spike shape cannot be defined in cases where a neuron model  
379 does not produce spikes. Our method has the potential to significantly speed up inference in these scenarios.

### 380 **Implications for the operation of neural circuits**

381 Our findings suggest that neural circuits can be energy-efficient with largely disparate biophysical parameters, even  
382 with highly specific functional requirements under naturally-occurring perturbations. This raises the question of  
383 whether such energy efficiency is present in real biological systems, and how these systems could be tuned for  
384 metabolic efficiency.

### 385 **Acknowledgments**

386 We thank Sara A. Haddad and Eve Marder for sharing their data and discussions, Martin Stemmler for discussions,  
387 and Poornima Ramesh, Richard Gao, and Jan Boelts for discussions and comments on the manuscript. The authors  
388 thank the International Max Planck Research School for Intelligent Systems (IMPRS-IS) for supporting MD. This work  
389 was supported by the German Research Foundation (DFG) through SFB 1089 ‘Synaptic Microcircuits’ and Germany’s  
390 Excellence Strategy – EXC-Number 2064/1 – Project number 390727645 as well as the German Federal Ministry of  
391 Education and Research (BMBF, project ‘ADIMEM’, FKZ 01IS18052 A-D) to JHM.

## 392 Methods

### 393 Code availability

394 Code to reproduce the figures is available at [https://github.com/mackelab/stg\\_energy](https://github.com/mackelab/stg_energy). Code for running SNPE and  
395 training a classifier to reject 'invalid' simulations is available in our toolbox: <https://github.com/mackelab/sbi> [55]. A  
396 tutorial for how to use these features can be found on our website <https://mackelab.org/sbi>.

### 397 Data from the crustacean stomatogastric ganglion

398 We analyzed extracellular recordings of the stomatogastric motor neurons that are involved in the triphasic pyloric  
399 rhythm in the crab *Cancer borealis* [37]. The first dataset as seen in Fig. 2 and Fig. 7 is from files 845\_082\_0044 and  
400 845\_082\_0064, preparation 1. The second dataset as seen in Appendix 1 Fig. 10 and Appendix 1 Fig. 12 is from files  
401 857\_016\_0049 and 857\_016\_0069, preparation 1. The third dataset as seen in Appendix 1 Fig. 13 and Appendix 1  
402 Fig. 15 is from files 845\_078\_0027 and 845\_078\_0040, preparation 2. All preparations were decentralized, i.e. the ax-  
403 ons of the descending modulatory inputs were severed. The data were recorded at 11°C and 27°C. Full experimental  
404 details in Haddad and Marder [38].

### 405 Circuit model of the crustacean stomatogastric ganglion

The circuit model of the crustacean stomatogastric ganglion was adapted from Prinz et al. [5]. The model is composed  
of three single-compartment neurons, AB/PD, LP, and PY, where the electrically coupled AB and PD neurons are  
modeled as a single neuron. Each of the model neurons contains 8 currents, a Na<sup>+</sup> current  $I_{Na}$ , a fast and a slow  
transient Ca<sup>2+</sup> current  $I_{CaT}$  and  $I_{CaS}$ , a transient K<sup>+</sup> current  $I_A$ , a Ca<sup>2+</sup>-dependent K<sup>+</sup> current  $I_{KCa}$ , a delayed rectifier K<sup>+</sup>  
current  $I_{Kd}$ , a hyperpolarization-activated inward current  $I_H$ , and a leak current  $I_{leak}$ . In addition, the model contains 7  
synapses. As in Prinz et al. [5], these synapses are simulated using a standard model of synaptic dynamics [56]. The  
synaptic input current into the neurons is given by  $I_s = \bar{g}_s s (V_{post} - V_s)$ , where  $\bar{g}_s$  is the maximal synapse conductance,  
 $V_{post}$  the membrane potential of the postsynaptic neuron, and  $V_s$  the reversal potential of the synapse. The dynamics  
of the activation variable  $s$  are given by

$$\frac{ds}{dt} = \frac{\bar{s}(V_{pre}) - s}{\tau_s},$$

with

$$\bar{s}(V_{pre}) = \frac{1}{1 + \exp((V_{th} - V_{pre})/\delta)} \quad \text{and} \quad \tau_s = \frac{1 - \bar{s}(V_{pre})}{k_-}.$$

406 Here,  $V_{pre}$  is the membrane potential of the presynaptic neuron,  $V_{th}$  is the half-activation voltage of the synapse,  $\delta$   
407 sets the slope of the activation curve, and  $k_-$  is the rate constant for transmitter-receptor dissociation rate.

408 As in Prinz et al. [5], we model two types of synapses, since AB, LP, and PY are glutamatergic neurons whereas PD  
409 is cholinergic. We set  $E_s = -70$  mV and  $k_- = 1/40$  ms for all glutamatergic synapses and  $E_s = -80$  mV and  $k_- = 1/100$   
410 ms for all cholinergic synapses. For both synapse types, we set  $V_{th} = -35$  mV and  $\delta = 5$  mV. The membrane area is  
411  $0.628 \cdot 10^{-3}$  cm<sup>2</sup>.

412 For each set of membrane and synaptic conductances, we numerically simulate the circuit for 10 seconds with a  
413 step size of 0.025 ms. At each time step, each neuron receives Gaussian noise with mean zero and standard deviation  
414  $0.001$  mV·ms<sup>-0.5</sup>.

415 We applied SNPE to infer the posterior over 24 membrane parameters and 7 synaptic parameters, i.e. 31 parame-  
416 ters in total. The 7 synaptic parameters are the maximal conductances  $\bar{g}_s$  of all synapses in the circuit, each of which is  
417 varied uniformly in logarithmic domain from 0.01 nS to 1000 nS, with the exception of the synapse from AB to LP, which  
418 is varied uniformly in logarithmic domain from 0.01 nS to 10000 nS. The membrane parameters are the maximal mem-  
419 brane conductances for each neuron. The membrane conductances are varied over an extended range of previously  
420 reported values [5, 13]: The prior distribution over the parameters [Na, CaT, CaS, A, KCa, Kd, H, leak] is uniform with  
421 lower bounds  $p_{low} = [0, 0, 0, 0, 0, 25, 0, 0]$  mS cm<sup>-2</sup> and upper bounds  $p_{high} = [500, 7.5, 8, 60, 15, 150, 0.2, 0.01]$  mS cm<sup>-2</sup>  
422 for the maximal membrane conductances of the AB neuron,  $p_{low} = [0, 0, 2, 10, 0, 0, 0, 0.01]$  mS cm<sup>-2</sup> and  $p_{high} =$   
423  $[200, 2.5, 12, 60, 10, 125, 0.06, 0.04]$  mS cm<sup>-2</sup> for the maximal membrane conductances of the LP neuron, and  $p_{low} =$   
424  $[0, 0, 0, 30, 0, 50, 0, 0]$  mS cm<sup>-2</sup> and  $p_{high} = [600, 12.5, 4, 60, 5, 150, 0.06, 0.04]$  mS cm<sup>-2</sup> for the maximal membrane con-  
425 ductances of the PY neuron.

426 We computed 15 summary features proposed by Prinz et al. [5], and 3 additional features [13]. The features  
 427 proposed by Prinz et al. [5] are 15 salient features of the pyloric rhythm, namely: Cycle period  $T$  (s), AB/PD burst  
 428 duration  $d_{AB}^b$  (s), LP burst duration  $d_{LP}^b$  (s), PY burst duration  $d_{PY}^b$  (s), gap AB/PD end to LP start  $\Delta t_{AB-LP}^{es}$  (s), gap LP end to  
 429 PY start  $\Delta t_{LP-PY}^{es}$  (s), delay AB/PD start to LP start  $\Delta t_{AB-LP}^{ss}$  (s), delay LP start to PY start  $\Delta t_{LP-PY}^{ss}$  (s), AB/PD duty cycle  $d_{AB}$ , LP  
 430 duty cycle  $d_{LP}$ , PY duty cycle  $d_{PY}$ , phase gap AB/PD end to LP start  $\Delta \phi_{AB-LP}$ , phase gap LP end to PY start  $\Delta \phi_{LP-PY}$ , LP start  
 431 phase  $\phi_{LP}$ , and PY start phase  $\phi_{PY}$ . Note that several of these values are only defined if each neuron produces rhythmic  
 432 bursting behavior. In addition, for each of the three neurons, we computed the maximal duration of its voltage being  
 433 above  $-30$  mV. We did this as we observed—for many model simulations and in contrast with experimental data—  
 434 long plateaus at around  $-10$  mV during the bursts, and wanted to detect such traces. If the maximal duration was  
 435 below 5 ms, we set this feature to 5 ms. To extract the summary features from the observed experimental data, we  
 436 first found spikes by searching for local maxima above a hand-picked voltage threshold, and then extracted the 15  
 437 above described features. For the experimental preparation, we set the additional 3 features to 5 ms.

438 At temperatures higher than  $11^\circ\text{C}$ , we include  $Q_{10}$  values to simulate the biochemical changes of the network  
 439 parameters. These are defined by an Arrhenius-type factor

$$R_T = R_{ref} Q_{10}^{(T-T_{ref})/10}, \quad (1)$$

440 where  $R_{ref}$  is the parameter value at the reference temperature  $T_{ref} = 11^\circ\text{C}$ , and  $R_T$  is the parameter value at tem-  
 441 perature  $T$ . Each maximal conductance has a different  $Q_{10}$ , but the  $Q_{10}$  value is the same across neurons [40]. We  
 442 introduce one  $Q_{10}$  for the glutamatergic synapses and one for the cholinergic synapses. The prior distribution for the  
 443  $Q_{10}$  values is a uniform distribution between 1 and 2 for all maximal conductances but the hyperpolarization current,  
 444 for which the prior bounds are 1 and 4 [34]. The  $Q_{10}$  values for the time constants are fixed to 2.4 for most  $m$ -gates  
 445 and 2.8 for all  $h$ -gates. Following the results from Caplan et al. [39], the  $Q_{10}$  values for the  $m$ -gates of KCa and CaS as  
 446 well as for the calcium buffer have lower values: 2.0 for CaS and the calcium buffer and 1.6 for KCa. The  $Q_{10}$  value for  
 447 the time constants of the synapses is 1.7.

## 448 Energy consumption

449 To compute the energy consumption  $E$  of a specific network activity, we followed the approach of Moujahid et al. [35].  
 450 For each neuron, we computed the energy as:

$$E = \int \sum_m g_m (V - V_m)^2 + \sum_s g_s (V - V_s)^2 dt, \quad (2)$$

451 where  $g_m$  is the effective conductance of channel  $m$  (i.e. the product of the respective gating variables, maximal  
 452 conductance and membrane area) and  $g_s$  is the effective synaptic conductance  $s$  into the specific neuron.  $V_m$  is the  
 453 reversal potential of the membrane current  $m$  and  $V_s$  is the reversal potential of the synapse  $s$ . The units of energy  
 454 are [ $S \cdot V^2 \cdot s = J$ ], where  $S$  are Siemens,  $V$  are Volt,  $s$  are seconds, and  $J$  are Joules. The total energy consumption was  
 455 defined as the sum of the energy consumed by each of the three neurons. Throughout the manuscript, we report the  
 456 energy per second, which we obtained by dividing the total energy consumption by the duration of the simulation  
 457 (10 seconds).

458 The energy per spike was defined as the energy consumed during bursts divided by the respective number of  
 459 spikes.

## 460 Simulation-based inference

461 We extended Sequential Neural Posterior Estimation [13] by using a classifier to predict ‘invalid’ simulation outputs.

462 The resulting algorithm is described in algorithm 1.

---

### Algorithm 1: SNPE

---

**Input:** simulator with (implicit) density  $p(\mathbf{x}|\theta)$ , observed data  $\mathbf{x}_o$ , prior  $p(\theta)$ , rejection criterion  $g(\mathbf{x}) \in \{0, 1\}$ , classification neural network  $G_\zeta(\theta)$ , density family  $q_\phi$ , neural network  $F(\mathbf{x}, \phi)$ , number of cycles  $C$  of classifier training, simulation count for each cycle  $N_c$

randomly initialize  $\phi, \zeta$

$\tilde{p}_1(\theta) := p(\theta)$

$N := 0$

**for**  $c = 1$  **to**  $C$  **do**

**for**  $i = 1 \dots N_c$  **do**

        sample  $\theta_{N+i} \sim \tilde{p}_c(\theta)$

        simulate  $\mathbf{x}_{N+i} \sim p(\mathbf{x}|\theta_{N+i})$

        evaluate whether ‘valid’  $\mathbf{r}_{N+i} = g(\mathbf{x}_{N+i})$

$N \leftarrow N + N_c$

    train  $\zeta \leftarrow \arg \min_{\zeta} \sum_{j=1}^N \mathcal{L}_e(\theta_j, \mathbf{r}_j)$  // classifier training

$T \leftarrow$  Tune classifier threshold s.t. false negative rate  $< 1\%$

$U(\theta) \leftarrow G_\zeta(\theta) > T$

$\tilde{p}_c(\theta) \propto U(\theta)p(\theta)$

    train  $\phi \leftarrow \arg \min_{\phi} \sum_{j=1}^N \mathcal{L}_d(\theta_j, \mathbf{x}_j)$  // neural density estimator training

**return**  $q_{F(\mathbf{x}_o, \phi)}(\theta)$

---

## 464 Proof of convergence of SNPE with classifier

Below, we prove that the posterior distribution inferred by our method converges to the true posterior distribution. SNPE—with the classifier—minimizes the following loss function with respect to the neural network parameters  $\phi$ :

$$\begin{aligned} \mathcal{L}_d &= -\frac{1}{N} \sum_i \log(q_\phi(\theta_i|\mathbf{x}_i)) \\ &\xrightarrow{N \rightarrow \infty} -\mathbb{E}_{p(\theta, \mathbf{x})}[\log(q_\phi(\theta|\mathbf{x}))] \\ &= -\mathbb{E}_{U(\theta)p(\theta)p(\mathbf{x}|\theta)}[\log(q_\phi(\theta|\mathbf{x}))], \end{aligned}$$

where  $U(\theta)$  is a constant  $U(\theta) = c > 0$  at least on the posterior support and  $U(\theta) = 0$  elsewhere. Then:

$$\begin{aligned} \mathcal{L}_d &= -\iint U(\theta)p(\theta)p(\mathbf{x}|\theta) \log(q_\phi(\theta|\mathbf{x})) d\theta d\mathbf{x} \\ &= -\int p(\mathbf{x}) \int U(\theta)p(\theta|\mathbf{x}) \log(q_\phi(\theta|\mathbf{x})) d\theta d\mathbf{x} \end{aligned}$$

Since  $U(\theta) > 0$  at least on the support of  $p(\theta|\mathbf{x})$ :

$$\mathcal{L}_d = -\int p(\mathbf{x})c \int p(\theta|\mathbf{x}) \log(q_\phi(\theta|\mathbf{x})) d\theta d\mathbf{x}$$

465 Since the integrand of the integral over  $\theta$  is proportional to the Kullback-Leibler-divergence between the true posterior  
466  $p(\theta|\mathbf{x})$  and the inferred posterior  $q_\phi(\theta|\mathbf{x})$ ,  $\mathcal{L}_d$  is minimized if and only if  $q_\phi(\theta|\mathbf{x}) = p(\theta|\mathbf{x})$  for all  $\mathbf{x}$  on the support of  $p(\mathbf{x})$ .



## 467 **Classifier of ‘valid’ simulations**

468 The algorithm includes a classifier  $U(\theta)$  trained to predict ‘valid’ simulations. We use a cross-entropy loss  $\mathcal{L}_e$ . We  
469 enforce the classifier  $U(\theta)$  to be constant, with  $U(\theta) = c > 0$  at least on the posterior support and  $U(\theta) = 0$  elsewhere:

- 470 1. In order for  $U(\theta)$  to be uniform, we parameterize it as a thresholded binary classifier.
- 471 2. To ensure that  $c > 0$  at least on the posterior support, we choose the classifier threshold such that there are  
472 few false-negatives, i.e. the classifier accepts the parameters if these lie within the posterior support.

473 If we train the classifier  $U(\theta)$  with a large enough number of simulations, so that some are ‘valid’, the trained  
474 classifier includes the posterior support. In order to sample from  $U(\theta)p(\theta)$ , we sample from the prior over parameters  
475  $p(\theta)$  and accept the sampled parameters according to the classifier output.

## 476 **Inference of the posterior distribution given experimental data at 11°C**

477 Overall, we performed three cycles of simulation and classifier training in order to learn the restricted prior. In the  
478 first round, we simulated 3 million parameter sets sampled from the prior. Among these, only 0.97% produced ‘valid’  
479 summary features. We trained a classifier to detect parameter sets leading to ‘valid’ simulation outputs. We used a  
480 residual neural network with 80 hidden units, two blocks, a dropout rate of 43%, and a batchsize of 199. To deal with  
481 ‘valid’/‘invalid’ unbalanced data, we subsampled ‘invalid’ samples in every epoch. We post-hoc tuned the threshold  
482 of the classifier such that the ratio of false-negatives was below 1% on a held-out test set. We then drew 3 million  
483 samples from the resulting restricted prior. Out of these, 5.17% produced ‘valid’ summary features. We then repeated  
484 this procedure and out of 3 million simulations from the resulting restricted prior, 8.45% produced good simulations.  
485 Overall, in comparison to Gonçalves et al. [13], we used half as many simulations (9 million versus 18.5 million), but  
486 generated a database of ‘valid’ simulations 2.5 times larger. We then used all 438,608 ‘valid’ parameter sets to obtain  
487 the posterior distribution with SNPE (see Gonçalves et al. [13] for details). As deep neural density estimator, we chose  
488 a neural spline flow (NSF) [57] with 10 transform layers, each consisting of a residual block with two hidden layers,  
489 each with 200 hidden units.

490 Lastly, to ensure that the activity produced by samples from the posterior closely matched experimental data, we  
491 sampled 1 million parameter sets from the inferred posterior distribution and performed an additional rejection step,  
492 whereby posterior samples had to produce activity within a prescribed distance to the experimental data:

- 493 • cycle duration and burst durations deviated from the experimental features by a maximum distance of 0.02  
494 standard deviations of all simulations accepted by the classifier, i.e. 20.6 ms for the cycle duration, and [15.0,  
495 13.5, 11.5] ms for the burst durations (of AB/PD, LP, and PY neurons).
- 496 • duty cycles, phase gaps, phase delays, and phases deviated from the experimental features by a maximum  
497 distance of 0.2 standard deviations.

498 Out of 1 million samples from the posterior, 35,939 samples fulfilled all these criteria. Notably, these samples are  
499 no longer unbiased samples from the posterior distribution as estimated by SNPE, but they make up a database of  
500 model configurations whose activity closely matches experimental data.

## 501 **Regression neural network**

502 We performed a linear regression to identify the contribution of the circuit parameters to the total energy consump-  
503 tion using scikit-learn [58]. In order to test the robustness of the linear regression findings, we trained a regression  
504 network to identify directions in the parameter space predictive of total energy consumption. The regression network  
505 had the following characteristics: A Residual Network (ResNet) with one hidden layer with 20 hidden units, ReLU ac-  
506 tivation functions, and 50% dropout rate [59, 60]. We trained the network with a mean-squared error loss.

507 After training the regression network, we searched for directions that were most predictive of the network output  
508  $f(\cdot)$ . To do so, we followed the procedure described in Constantine [61] and computed:

$$M = \mathbb{E}_{\theta \sim p(\theta|x_o)}[\nabla_{\theta} f(\theta) \nabla_{\theta} f(\theta)^T]. \quad (3)$$

509 Intuitively,  $M$  captures how much the regression function  $f(\cdot)$  changes in different directions of the parameter space,  
510 computed as an expected value over posterior samples. We estimated this expected value with a Monte Carlo mean  
511 over 10,000 samples from the posterior distribution. We then computed the eigenvalue decomposition of  $M$ : The

512 eigenvectors of highest eigenvalue are directions in the parameter space along which the output of the regression  
513 neural network is most sensitive to changes.

### 514 **Minimal tuning mechanisms for low energy consumption**

515 In order to find tuning mechanisms for low energy consumption, we started by varying single or pairs of parameters  
516 on a grid while keeping all other parameters constant (at a value taken from our database of 35,939 models). For the  
517 matrices in Fig. 5e,f, we repeated the analysis with ten of such models and reported the average.

518 To predict the energy consumption for any parameter configuration, we used the linear regression model from  
519 circuit parameters onto energy consumption described above. To evaluate whether a parameter set matches experi-  
520 mental data, we computed its posterior probability  $p(\theta|\mathbf{x}_o)$ . If the posterior probability was above a certain threshold  
521  $t$ , we considered the parameter set as matching the experimental data, otherwise we discarded the parameter set. To  
522 obtain the threshold  $t$ , we evaluated the posterior probability of all 35,939 models in our database and used the 10%  
523 quantile of these probabilities as  $t$ : within our database of models, 90% of the models would have been considered  
524 as matching experimental data, whereas 10% of the models would have been (wrongly) discarded. We evaluated  
525 different choices for the quantile used to obtain  $t$  and obtained qualitatively similar results.

526 In order to obtain the directions in the parameter space along which energy consumption can be maximally re-  
527 duced (arrows in Fig. 5e,f), we searched the (1-dimensional or 2-dimensional) grids for the configurations with lowest  
528 and highest energy consumption (subject to posterior probability  $\geq t$ ). For each grid, we reported the sign of the  
529 direction between these two points of highest and lowest energy consumption.

### 530 **Sampling synaptic conductances, given energy efficient single-neuron configurations**

531 In order to investigate whether efficient single-neuron parameters could lead to efficient and robust network activ-  
532 ity, we first searched our database of 35,939 network configurations for the five configurations that had the lowest  
533 metabolic cost in each neuron individually. We combined these single neuron configurations to generate  $5^3 = 125$   
534 configurations of membrane conductances. For each of the configurations, we then sampled 1,000 synaptic configu-  
535 rations from the distribution:

$$p(\theta_s|\theta_m, \mathbf{x}_o) \propto p(\theta_s, \theta_m|\mathbf{x}_o), \quad (4)$$

536 where  $\theta_s$  and  $\theta_m$  are the synaptic and membrane conductances, respectively. We drew these samples with Markov  
537 chain Monte Carlo: Specifically, we used Slice Sampling with axis-aligned updates [62]. We then simulated each of  
538 these  $5^3 \cdot 1000$  configurations. 72 out of the  $5^3$  configurations contained at least one sample that fulfilled our (distance  
539 to experimental data) criteria, and 123 configurations contained a sample that fulfilled a slightly wider criteria (allowing  
540 twice as much distance from the experimental data). For the remaining two configurations, we drew another 10,000  
541 samples with MCMC and for each of them found at least one configuration whose activity fulfilled the slightly wider  
542 criteria. The histograms in figures Fig. 6e,f are produced with all simulations that fulfilled the narrow criteria.

### 543 **Posterior distribution given experimental data at 27°C**

In order to infer the posterior distribution given experimental data at 27°C, we started by sampling 3 million param-  
eter sets from the 31-dimensional posterior distribution at 11°C:

$$p(\theta|\mathbf{x}_o^{11}) \propto p(\mathbf{x}_o^{11}|\theta)p(\theta).$$

We then drew 3 million sets of  $Q_{10}$  values from the prior distribution over  $Q_{10}$  values ( $Q_{10}$  prior in Methods, Circuit  
model of the crustacean stomatogastric ganglion). We simulated these 3 million parameter sets at 27°C, from which  
approximately 18% were 'valid' and were used to train a deep neural density estimator (see Proof of convergence of  
SNPE with classifier). The hyperparameters of the neural density estimator were the same as the ones chosen for the  
inference at 11°C. Since this density estimator was trained on parameters sampled from the posterior distribution at  
11°C, the inferred posterior is an approximation to:

$$p(\theta|\mathbf{x}_o^{27}, \mathbf{x}_o^{11}) \propto p(\mathbf{x}_o^{27}|\theta)p(\theta|\mathbf{x}_o^{11}) \propto p(\mathbf{x}_o^{27}|\theta)p(\mathbf{x}_o^{11}|\theta)p(\theta),$$

544 where  $\mathbf{x}_o^{11}$  and  $\mathbf{x}_o^{27}$  are the features of the experimental data recorded at 11°C and 27°C, respectively. In other words,  
545 the resulting posterior distribution matches prior knowledge about circuit parameters as well as experimental data

546 at 11°C and 27°C. Note that we inferred the posterior distribution at 11°C while ignoring the  $Q_{10}$  values because the  
547  $Q_{10}$  values, by definition, do not influence the circuit activity at the reference temperature (which is assumed to be  
548 11°C).

### 549 **Metabolic efficiency at 27°C**

550 For panels Fig. 7e,f and Fig. 7g (pink plot), we analyzed 967 simulations that closely matched experimental data  
551 recorded at 11°C and 27°C. For Fig. 7g (purple plot), we simulated, at 27°C, the 35,939 circuit configurations that  
552 match experimental data recorded at 11°C. Out of these, 8121 were robust, i.e. displayed pyloric activity at 27°C.

### 553 **References**

- 554 [1] J. Golowasch, L. Abbott, and E. Marder. Activity-dependent regulation of potassium currents in an identified neuron of the  
555 stomatogastric ganglion of the crab cancer borealis. *Journal of Neuroscience*, 19(20):RC33–RC33, 1999.
- 556 [2] J. Golowasch, M. S. Goldman, L. Abbott, and E. Marder. Failure of averaging in the construction of a conductance-based neuron  
557 model. *Journal of neurophysiology*, 87(2):1129–1131, 2002.
- 558 [3] M. S. Goldman, J. Golowasch, E. Marder, and L. Abbott. Global structure, robustness, and modulation of neuronal models.  
559 *Journal of Neuroscience*, 21(14):5229–5238, 2001.
- 560 [4] A. A. Prinz, C. P. Billimoria, and E. Marder. Alternative to hand-tuning conductance-based models: construction and analysis of  
561 databases of model neurons. *Journal of Neurophysiology*, 90(6):3998–4015, 2003.
- 562 [5] A. A. Prinz, D. Bucher, and E. Marder. Similar network activity from disparate circuit parameters. *Nature Neuroscience*, 7(12):  
563 1345, 2004.
- 564 [6] G. M. Edelman and J. A. Gally. Degeneracy and complexity in biological systems. *Proceedings of the National Academy of Sciences*,  
565 98(24):13763–13768, 2001.
- 566 [7] E. Marder and A. L. Taylor. Multiple models to capture the variability in biological neurons and networks. *Nature Neuroscience*,  
567 14(2):133, 2011.
- 568 [8] J. N. MacLean, Y. Zhang, B. R. Johnson, and R. M. Harris-Warrick. Activity-independent homeostasis in rhythmically active  
569 neurons. *Neuron*, 37(1):109–120, 2003.
- 570 [9] J. N. MacLean, Y. Zhang, M. L. Goeritz, R. Casey, R. Oliva, J. Guckenheimer, and R. M. Harris-Warrick. Activity-independent  
571 coregulation of ia and ih in rhythmically active neurons. *Journal of Neurophysiology*, 94(5):3601–3617, 2005.
- 572 [10] R. N. Gutenkunst, J. J. Waterfall, F. P. Casey, K. S. Brown, C. R. Myers, and J. P. Sethna. Universally sloppy parameter sensitivities  
573 in systems biology models. *PLoS Computational Biology*, 3(10):e189, 2007.
- 574 [11] R. Grashow, T. Brookings, and E. Marder. Compensation for variable intrinsic neuronal excitability by circuit-synaptic interac-  
575 tions. *Journal of Neuroscience*, 30(27):9145–9156, 2010.
- 576 [12] T. O’Leary, A. C. Sutton, and E. Marder. Computational models in the age of large datasets. *Current Opinion in Neurobiology*, 32:  
577 87–94, 2015.
- 578 [13] P. J. Gonçalves, J.-M. Lueckmann, M. Deistler, M. Nonnenmacher, K. Öcal, G. Bassetto, C. Chintaluri, W. F. Podlaski, S. A. Haddad,  
579 T. P. Vogels, et al. Training deep neural density estimators to identify mechanistic models of neural dynamics. *Elife*, 9:e56261,  
580 2020.
- 581 [14] A. Hasenstaub, S. Otte, E. Callaway, and T. J. Sejnowski. Metabolic cost as a unifying principle governing neuronal biophysics.  
582 *Proceedings of the National Academy of Sciences*, 107(27):12329–12334, 2010.
- 583 [15] B. Sengupta, A. A. Faisal, S. B. Laughlin, and J. E. Niven. The effect of cell size and channel density on neuronal information  
584 encoding and energy efficiency. *Journal of Cerebral Blood Flow & Metabolism*, 33(9):1465–1473, 2013.
- 585 [16] B. Sengupta and M. B. Stemmler. Power consumption during neuronal computation. *Proceedings of the IEEE*, 102(5):738–750,  
586 2014.
- 587 [17] J. Astrup, P. M. Sørensen, and H. R. Sørensen. Oxygen and glucose consumption related to na<sup>+</sup>-k<sup>+</sup> transport in canine brain.  
588 *Stroke*, 12(6):726–730, 1981.
- 589 [18] J. Astrup, P. M. Sørensen, and H. R. Sørensen. Inhibition of cerebral oxygen and glucose consumption in the dog by hypothermia,  
590 pentobarbital, and lidocaine. *Anesthesiology: The Journal of the American Society of Anesthesiologists*, 55(3):263–268, 1981.

- 591 [19] L. Sokoloff. Energetics of functional activation in neural tissues. *Neurochemical research*, 24(2):321–329, 1999.
- 592 [20] D. Attwell and S. B. Laughlin. An energy budget for signaling in the grey matter of the brain. *Journal of Cerebral Blood Flow &*  
593 *Metabolism*, 21(10):1133–1145, 2001.
- 594 [21] H. Alle, A. Roth, and J. R. Geiger. Energy-efficient action potentials in hippocampal mossy fibers. *Science*, 325(5946):1405–1408,  
595 2009.
- 596 [22] M. B. Stemmler, B. Sengupta, S. Laughlin, and J. Niven. Energetically optimal action potentials. In *Advances in neural information*  
597 *processing systems*, pages 1566–1574, 2011.
- 598 [23] B. C. Carter and B. P. Bean. Sodium entry during action potentials of mammalian neurons: incomplete inactivation and reduced  
599 metabolic efficiency in fast-spiking neurons. *Neuron*, 64(6):898–909, 2009.
- 600 [24] B. Sengupta, M. Stemmler, S. B. Laughlin, and J. E. Niven. Action potential energy efficiency varies among neuron types in  
601 vertebrates and invertebrates. *PLoS Comput Biol*, 6(7):e1000840, 2010.
- 602 [25] G. Yi, Y. Fan, and J. Wang. Metabolic cost of dendritic ca<sup>2+</sup> action potentials in layer 5 pyramidal neurons. *Frontiers in neuro-*  
603 *science*, 13, 2019.
- 604 [26] S. Onasch and J. Gjorgjieva. Circuit stability to perturbations reveals hidden variability in the balance of intrinsic and synaptic  
605 conductances. *Journal of Neuroscience*, 40(16):3186–3202, 2020.
- 606 [27] F. A. Roemschied, M. J. Eberhard, J.-H. Schleimer, B. Ronacher, and S. Schreiber. Cell-intrinsic mechanisms of temperature  
607 compensation in a grasshopper sensory receptor neuron. *Elife*, 3:e02078, 2014.
- 608 [28] R. M. Harris-Warrick, E. Marder, A. I. Selverston, M. Moulins, T. J. Sejnowski, and T. A. Poggio. *Dynamic biological networks: the*  
609 *stomatogastric nervous system*. MIT press, 1992.
- 610 [29] E. Marder and D. Bucher. Understanding circuit dynamics using the stomatogastric nervous system of lobsters and crabs. *Annu.*  
611 *Rev. Physiol.*, 69:291–316, 2007.
- 612 [30] J.-M. Lueckmann, P. J. Goncalves, G. Bassetto, K. Öcal, M. Nonnenmacher, and J. H. Macke. Flexible statistical inference for  
613 mechanistic models of neural dynamics. In *Advances in Neural Information Processing Systems*, pages 1289–1299, 2017.
- 614 [31] L. Stehlik, C. MacKenzie Jr, and W. Morse. Distribution and abundance of four brachyuran crabs on the northwest atlantic shelf.  
615 *Fishery Bulletin*, 89(3):473–492, 1991.
- 616 [32] M. J. Donahue, A. Nichols, C. A. Santamaria, P. E. League-Pike, C. J. Krediet, K. O. Perez, and M. J. Shulman. Predation risk, prey  
617 abundance, and the vertical distribution of three brachyuran crabs on gulf of maine shores. *Journal of Crustacean Biology*, 29  
618 (4):523–531, 2009.
- 619 [33] C. J. Krediet and M. J. Donahue. Growth-mortality trade-offs along a depth gradient in cancer borealis. *Journal of Experimental*  
620 *Marine Biology and Ecology*, 373(2):133–139, 2009.
- 621 [34] L. S. Tang, M. L. Goeritz, J. S. Caplan, A. L. Taylor, M. Fisek, and E. Marder. Precise temperature compensation of phase in a  
622 rhythmic motor pattern. *PLoS Biol*, 8(8):e1000469, 2010.
- 623 [35] A. Moujahid, A. d’Anjou, F. Torrealdea, and F. Torrealdea. Energy and information in hodgkin-huxley neurons. *Physical Review*  
624 *E*, 83(3):031912, 2011.
- 625 [36] L. M. Alonso and E. Marder. Visualization of currents in neural models with similar behavior and different conductance densities.  
626 *eLife*, 8:e42722, 2019.
- 627 [37] S. A. Haddad and E. Marder. Recordings from the c. borealis stomatogastric nervous system at different temperatures in the  
628 decentralized condition, July 2021. URL <https://doi.org/10.5281/zenodo.5139650>.
- 629 [38] S. A. Haddad and E. Marder. Circuit robustness to temperature perturbation is altered by neuromodulators. *Neuron*, 100(3):  
630 609–623, 2018.
- 631 [39] J. S. Caplan, A. H. Williams, and E. Marder. Many parameter sets in a multicompartment model oscillator are robust to temper-  
632 ature perturbations. *Journal of Neuroscience*, 34(14):4963–4975, 2014.
- 633 [40] L. M. Alonso and E. Marder. Temperature compensation in a small rhythmic circuit. *Elife*, 9:e55470, 2020.
- 634 [41] E. Marder. Variability, compensation, and modulation in neurons and circuits. *Proceedings of the National Academy of Sciences*,  
635 108(Supplement 3):15542–15548, 2011.

- 636 [42] E. Marder, M. L. Goeritz, and A. G. Otopalik. Robust circuit rhythms in small circuits arise from variable circuit components and  
637 mechanisms. *Current Opinion in Neurobiology*, 31:156–163, 2015.
- 638 [43] G. Papamakarios, T. Pavlakou, and I. Murray. Masked autoregressive flow for density estimation. In *Advances in Neural Infor-*  
639 *mation Processing Systems*, pages 2338–2347, 2017.
- 640 [44] D. Greenberg, M. Nonnenmacher, and J. Macke. Automatic posterior transformation for likelihood-free inference. In *Interna-*  
641 *tional Conference on Machine Learning*, pages 2404–2414, 2019.
- 642 [45] L. S. Tang, A. L. Taylor, A. Rinberg, and E. Marder. Robustness of a rhythmic circuit to short-and long-term temperature changes.  
643 *Journal of Neuroscience*, 32(29):10075–10085, 2012.
- 644 [46] A. Rinberg, A. L. Taylor, and E. Marder. The effects of temperature on the stability of a neuronal oscillator. *PLoS Comput Biol*, 9  
645 (1):e1002857, 2013.
- 646 [47] T. O’Leary and E. Marder. Temperature-robust neural function from activity-dependent ion channel regulation. *Current Biology*,  
647 26(21):2935–2941, 2016.
- 648 [48] J. A. Haley, D. Hampton, and E. Marder. Two central pattern generators from the crab, *cancer borealis*, respond robustly and  
649 differentially to extreme extracellular pH. *Elife*, 7:e41877, 2018.
- 650 [49] S. Gorur-Shandilya, E. M. Cronin, A. C. Schneider, S. A. Haddad, P. Rosenbaum, D. Bucher, F. Nadim, and E. Marder. Mapping  
651 circuit dynamics during function and dysfunction. *bioRxiv*, 2021.
- 652 [50] J. Ratliff, A. Franci, E. Marder, and T. O’Leary. Neuronal oscillator robustness to multiple global perturbations. *Biophysical*  
653 *Journal*, 2021.
- 654 [51] G. Le Masson, S. Przedborski, and L. Abbott. A computational model of motor neuron degeneration. *Neuron*, 83(4):975–988,  
655 2014.
- 656 [52] W. B. Levy and R. A. Baxter. Energy-efficient neuronal computation via quantal synaptic failures. *Journal of Neuroscience*, 22  
657 (11):4746–4755, 2002.
- 658 [53] B. Sengupta, M. B. Stemmler, and K. J. Friston. Information and efficiency in the nervous system—a synthesis. *PLoS Comput*  
659 *Biol*, 9(7):e1003157, 2013.
- 660 [54] M.-J. Cabirol-Pol, D. Combes, V. S. Fénelon, J. Simmers, and P. Meyrand. Rare and spatially segregated release sites mediate a  
661 synaptic interaction between two identified network neurons. *Journal of neurobiology*, 50(2):150–163, 2002.
- 662 [55] A. Tejero-Cantero, J. Boelts, M. Deistler, J.-M. Lueckmann, C. Durkan, P. J. Gonçalves, D. S. Greenberg, and J. H. Macke. Sbi—a  
663 toolkit for simulation-based inference. *arXiv preprint arXiv:2007.09114*, 2020.
- 664 [56] L. Abbott and E. Marder. Modeling small networks, 1998.
- 665 [57] C. Durkan, A. Bekasov, I. Murray, and G. Papamakarios. Neural spline flows. In *Advances in Neural Information Processing Systems*,  
666 pages 7511–7522, 2019.
- 667 [58] F. Pedregosa, G. Varoquaux, A. Gramfort, V. Michel, B. Thirion, O. Grisel, M. Blondel, P. Prettenhofer, R. Weiss, V. Dubourg,  
668 J. Vanderplas, A. Passos, D. Cournapeau, M. Brucher, M. Perrot, and E. Duchesnay. Scikit-learn: Machine learning in Python.  
669 *Journal of Machine Learning Research*, 12:2825–2830, 2011.
- 670 [59] K. He, X. Zhang, S. Ren, and J. Sun. Deep residual learning for image recognition. In *Proceedings of the IEEE conference on*  
671 *computer vision and pattern recognition*, pages 770–778, 2016.
- 672 [60] N. Srivastava, G. Hinton, A. Krizhevsky, I. Sutskever, and R. Salakhutdinov. Dropout: a simple way to prevent neural networks  
673 from overfitting. *The journal of machine learning research*, 15(1):1929–1958, 2014.
- 674 [61] P. G. Constantine. *Active subspaces: Emerging ideas for dimension reduction in parameter studies*. SIAM, 2015.
- 675 [62] R. M. Neal. Slice sampling. *The annals of statistics*, 31(3):705–767, 2003.

676 **Supplementary material**

677 **Supplementary figures**

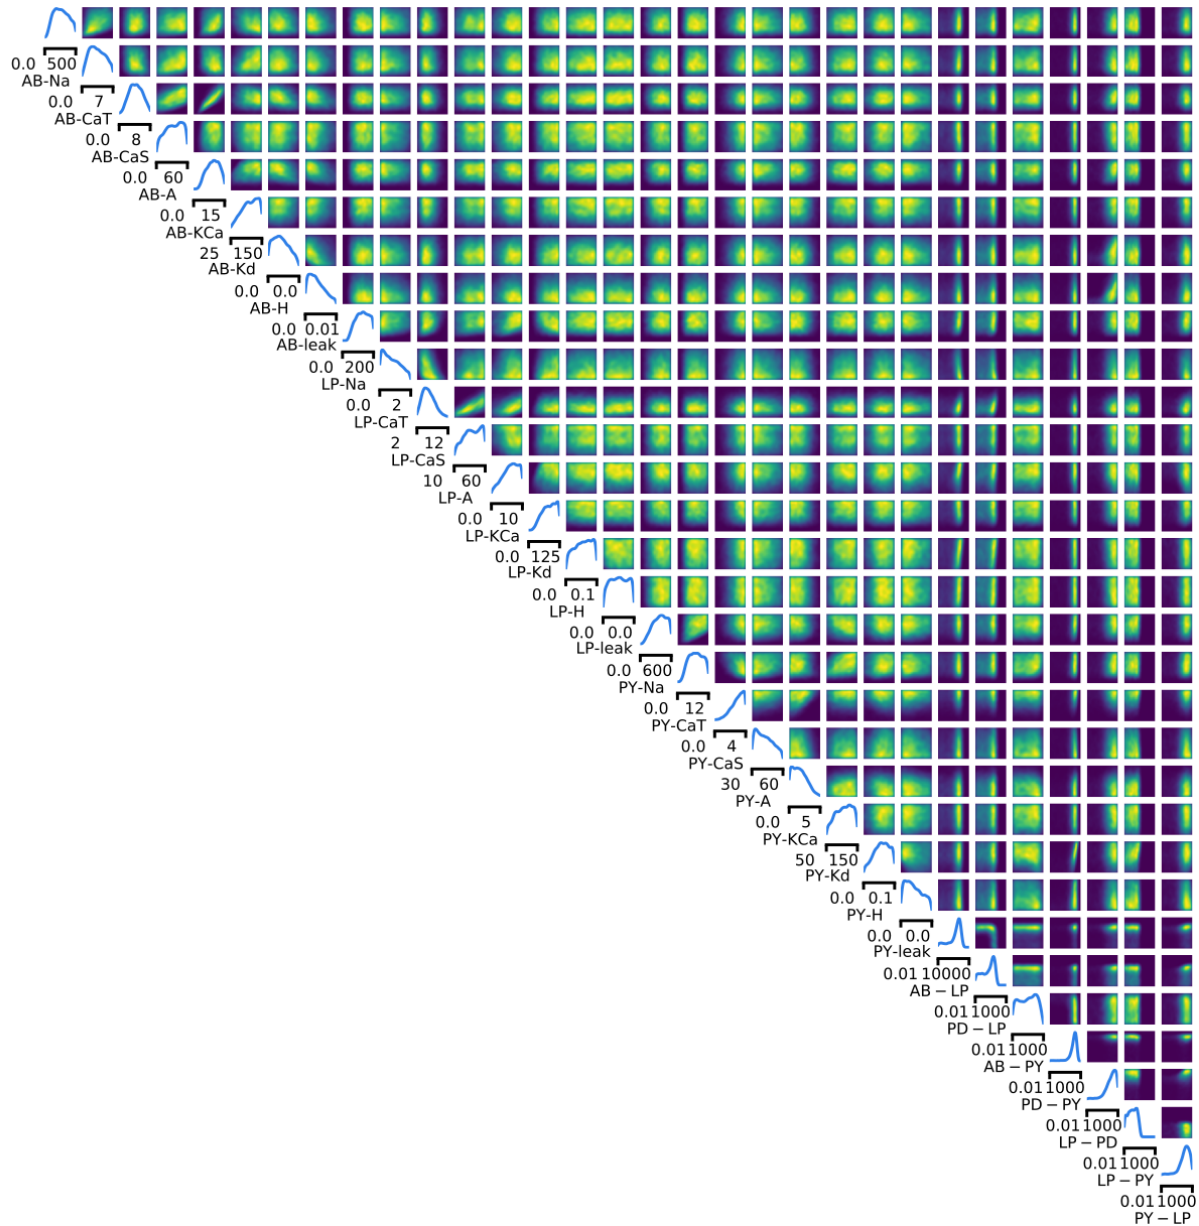

679 **Supplementary Figure 1. Full posterior distribution over circuit parameters given experimental data at 11°C.**  
 680 Panels on the diagonal are marginals, panels on the upper right are pairwise marginals. The first 24 parameters are  
 681 membrane conductances, the last 7 parameters are synaptic conductances. All membrane conductances are maximal  
 682 conductances and are given in mS/cm<sup>2</sup>, all synaptic conductances are given in nS.

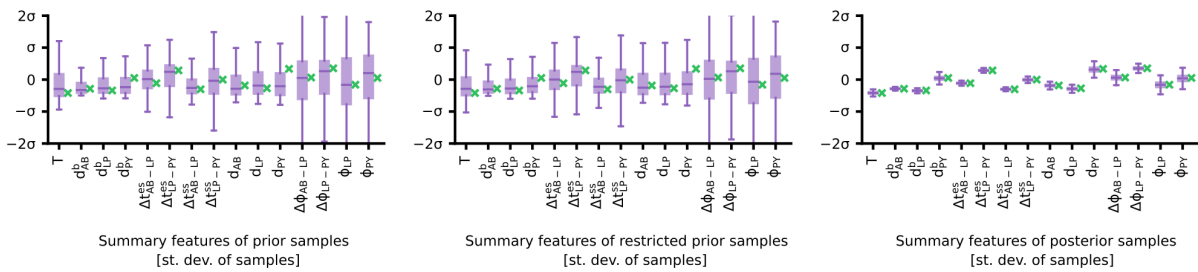

685 **Supplementary Figure 2. Summary features of activity produced by sampling from the prior, the restricted prior,**  
 686 **and the posterior.** Experimentally observed activity in green. The boxplots indicate maximum, 75% quantile, median, 25%  
 687 quantile, and minimum. All summary features are z-scored with the mean and standard deviation of all simulations from  
 688 prior samples.

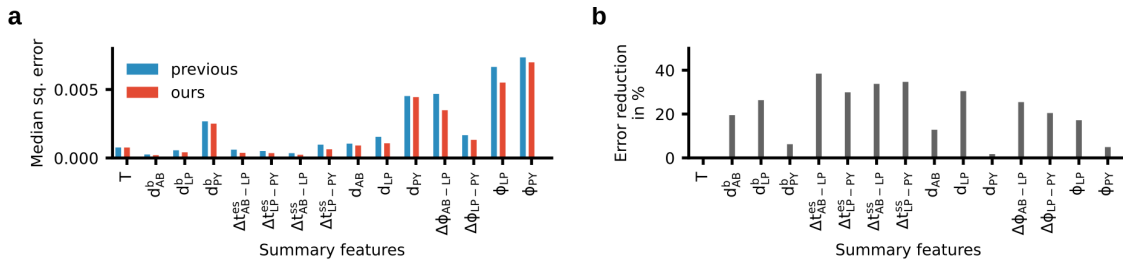

691 **Supplementary Figure 3. Accuracy of the enhanced version of SNPE versus accuracy in [13].** While we used half as  
 692 many simulations (9 million versus 18 million), the accuracy of the method improved. (a) Median squared discrepancy  
 693 between the experimentally measured activity and the activity produced by samples from the posterior. When using the  
 694 classifier (red), the activity produced by posterior samples is closer to experimental activity than without the classifier  
 695 (blue). (b) Reduction of mean squared discrepancy between our previous results and the presented method. All distances  
 696 are computed after z-scoring the summary features with the mean and standard deviation of all prior samples.

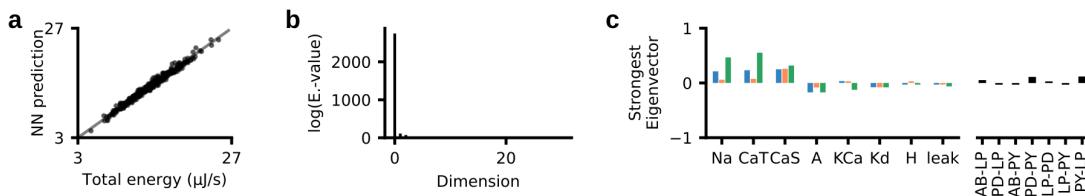

699 **Supplementary Figure 4. Neural network regression from circuit parameters onto the total energy consumption.**  
 700 (a) Performance of a neural network predicting the total energy from circuit parameters. (b) Eigenvalue-spectrum of the  
 701 trained neural network reveals a single dominating direction (details in Methods). (c) The eigenvector corresponding to the  
 702 strongest eigenvalue is similar to the linear regression weights  $w$  (Fig. 4c).

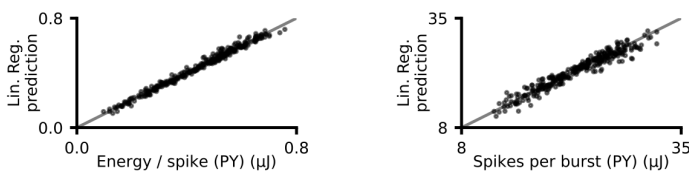

705 **Supplementary Figure 5. Performance of linear regression.** Left: Performance of linear regression from circuit  
 706 parameters (taken from our database of 35,393 models) onto energy per spike in the PY neuron. Right: Performance of  
 707 linear regression from circuit parameters onto the average number of spikes within a burst.

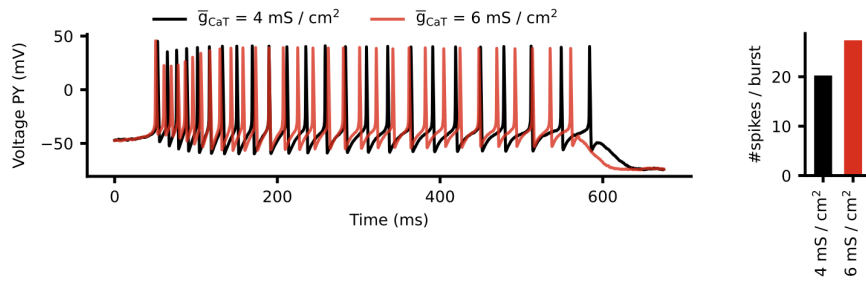

710 **Supplementary Figure 6. Influence of maximal conductance of transient calcium current on circuit function.** Left:  
 711 Voltage trace in the PY neuron during activity produced by two circuit configurations (black and red) which are identical  
 712 apart from the magnitude of  $\bar{g}_{CaT}$ . Right: The average number of spikes per burst in the PY neuron for the two  
 713 configurations. The configuration with higher  $\bar{g}_{CaT}$  produces more spikes.

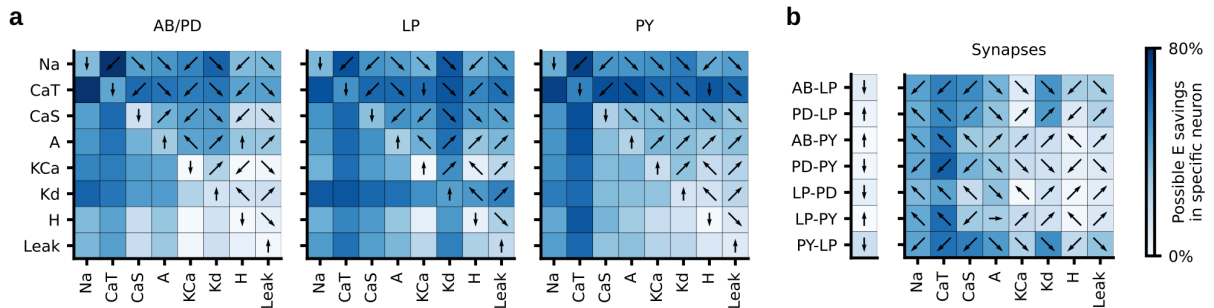

716 **Supplementary Figure 7. Potential energy savings in a single neuron.** (a) The fraction of energy that can be saved in a  
 717 single neuron by modifying just a single membrane parameter (diagonal of each matrix) or pairs of membrane parameters  
 718 (upper and lower diagonal) in that neuron. Unlike Fig. 5e, only the energy in the neuron whose parameters are varied is  
 719 considered. Colorbar as in panel (b). The arrows indicate the direction in which (pairs of) parameters should change in  
 720 order to reduce energy: Left/right refers to the parameter on the x-axis, top/bottom refers to the parameter on the y-axis.  
 721 (b) The fraction of energy that can be saved by modifying a synaptic conductance (vector on the left) or the synaptic  
 722 conductance and one membrane conductance of the postsynaptic neuron (matrix on the right). The energy is computed in  
 723 the postsynaptic neuron.



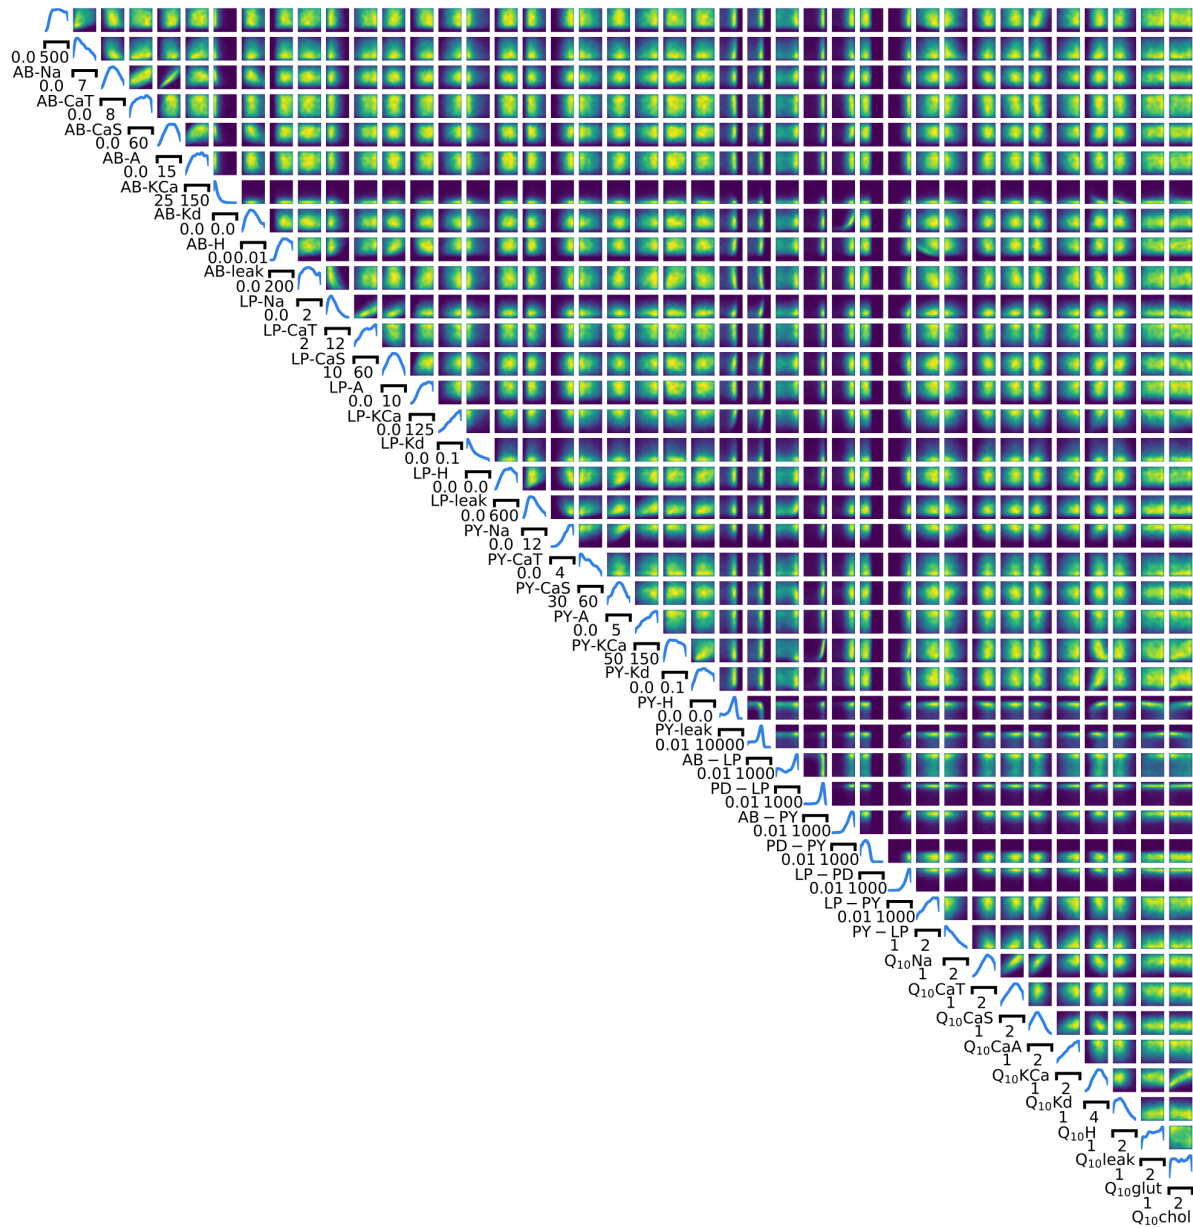

726 **Supplementary Figure 8. Full posterior distribution over 31 circuit parameters and 10  $Q_{10}$  parameters given**  
 728 **experimental data at 11°C and 27°C.**

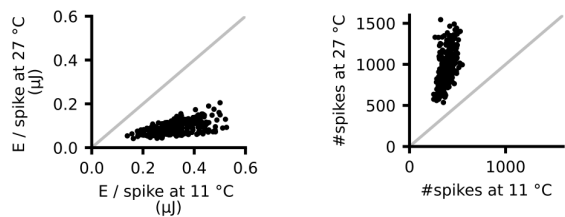

730 **Supplementary Figure 9. Energy consumption of the circuit at 11°C and at 27°C. Energy per spike (left) and number of**  
 731 **spikes (right) for parameter configurations simulated at 11°C and 27°C. The energy per spike is smaller at higher**  
 733 **temperatures, but the number of spikes is higher at higher temperatures.**

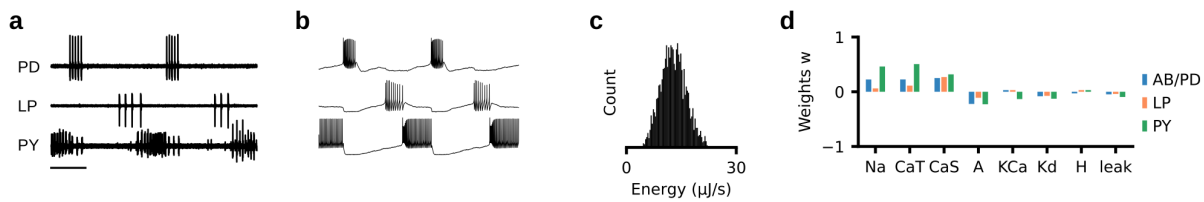

735 **Supplementary Figure 10. Analysis of a second experimental preparation.** (a) Experimental data recorded at 11°C. (b)  
736 Sample from posterior distribution matches the experimental data. (c) Energy consumption of 2804 model configurations  
737 that closely match experimental data. (d) Weights  $w$  of a linear regression from circuit parameters onto total energy  
738 consumption.

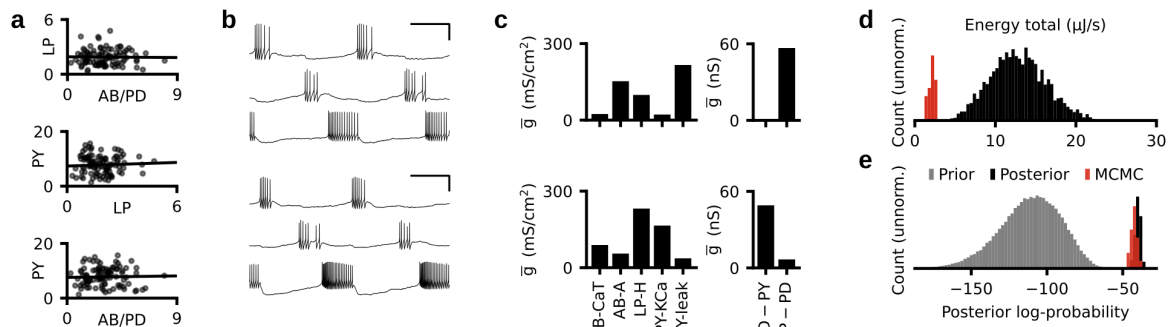

741 **Supplementary Figure 11. Tuning neurons individually, for a second experimental preparation.** (a) Black dots:  
742 Energy consumed by each neuron separately. Black line: Linear regression (correlation coefficient  $r = -0.009$ , p-value  
743  $p = 0.39$ ; LP versus PY,  $r = 0.21$ ,  $p = 0.0012$ ; AB/PD versus PY,  $r = 0.059$ ,  $p = 0.10$ ). (b) The activity produced by two  
744 parameter configurations produced with the strategy described in Fig. 6b. (c) A subset of the membrane (left) and synaptic  
745 (right) conductances for the configurations in panel (c). The membrane conductances are scaled with the following factors  
746 (left to right): 100, 10, 10,000, 100, 10,000. (d) Histogram over the total energy consumption of all 2804 model  
747 configurations in our database and the energy consumption of the configurations produced with the strategy described in  
748 Fig. 6b (red). (e) Histogram of the posterior log-probability for samples from the prior distribution (grey), for the 2804  
749 models in our database (black), and for the configurations produced with the strategy described in Fig. 6b (red).

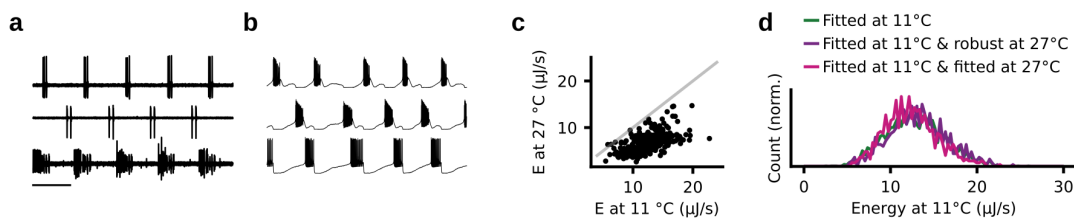

752 **Supplementary Figure 12. Analysis of temperature robustness of a second experimental preparation.** (a)  
753 Experimental data recorded at 27°C. (b) Sample from posterior distribution matches the experimental data. (c) Energy  
754 consumption at 11°C versus energy consumption at 27°C. (d) Green: Distribution of the energy consumption of circuits  
755 matching experimental data at 11°C. Purple: Distribution of the energy consumption of circuits that match data at 11°C  
756 and are robust at 27°C. Pink: Distribution of the energy consumption of circuits that match experimental data at 11°C and  
757 27°C.

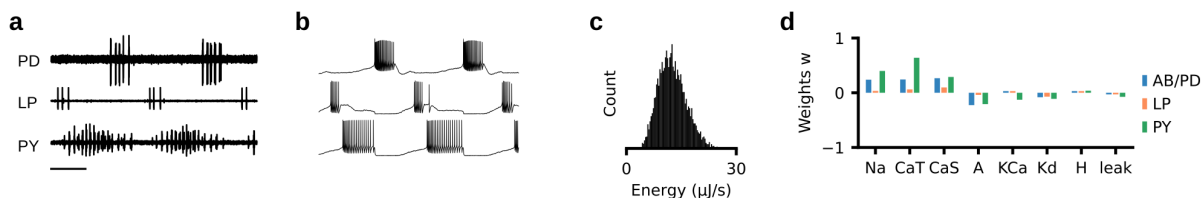

760 **Supplementary Figure 13. Analysis of a third experimental preparation.** (a) Experimental data recorded at 11°C. (b)  
761 Sample from posterior distribution matches the experimental data. (c) Energy consumption of 6926 model configurations  
762 that closely match experimental data. (d) Weights  $w$  of a linear regression from circuit parameters onto total energy  
763 consumption.

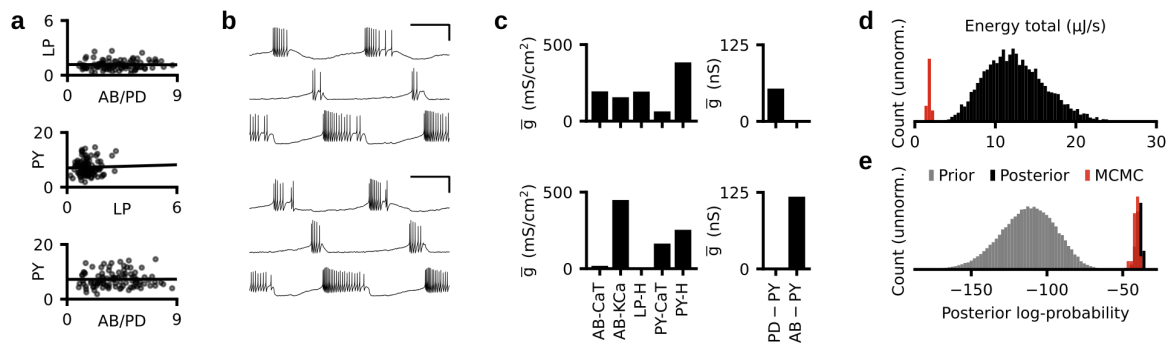

766 **Supplementary Figure 14. Tuning neurons individually, for a third experimental preparation.** (a) Black dots: Energy  
 767 consumed by each neuron separately. Black line: Linear regression (correlation coefficient  $r = -0.003$ ,  $p$ -value  $p = 0.39$ ; LP  
 768 versus PY,  $r = 0.19$ ,  $p = 0.007$ ; AB/PD versus PY,  $r = 0.006$ ,  $p = 0.77$ ). (b) The activity produced by two parameter  
 769 configurations produced with the strategy described in Fig. 6b. (c) A subset of the membrane (left) and synaptic (right)  
 770 conductances for the configurations in panel (c). The membrane conductances are scaled with the following factors (left to  
 771 right): 100, 100, 10,000, 100, 10,000. (d) Histogram over the total energy consumption of all 6926 model configurations in  
 772 our database and the energy consumption of the configurations produced with the strategy described in Fig. 6b (red). (e)  
 773 Histogram of the posterior log-probability for samples from the prior distribution (grey), for the 6926 models in our  
 774 database (black), and for the configurations produced with the strategy described in Fig. 6b (red).

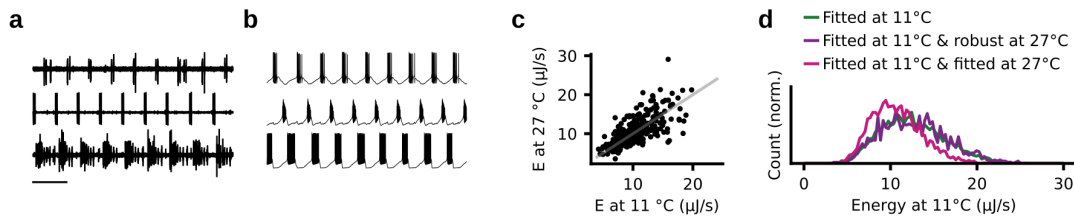

777 **Supplementary Figure 15. Analysis of temperature robustness of a third experimental preparation.** (a)  
 778 Experimental data recorded at 27°C. (b) Sample from posterior distribution matches the experimental data. (c) Energy  
 779 consumption at 11°C versus energy consumption at 27°C. (d) Green: Distribution of the energy consumption of circuits  
 780 matching experimental data at 11°C. Purple: Distribution of the energy consumption of circuits that match data at 11°C  
 781 and are robust at 27°C. Pink: Distribution of the energy consumption of circuits that match experimental data at 11°C and  
 782 27°C.
